# Supplementary material for: Amplisins A–E, chromone methide polymers with hypoglycemic activity from a new fungicolous fungus Amplistroma fungicola
Source: Royal Society of Chemistry journal article supplement (doi:10.1039/d0qo00851f), 2020-01-01
Supplement: d0qo00851f1.pdf [file d0qo00851f1.pdf]

## Supporting information

### **Amplisins A –E, chromone methide addition products with hypoglycemic activity from a fungicolous fungus *Amplistroma fungicola***

*Baosong Chen,<sup>†, ‡, #</sup> Junjie Han,<sup>†, ‡, #</sup> Mengmeng Wang,<sup>†, ‡</sup> Huanqin Dai,<sup>†</sup> Jinjin Zhang,<sup>†, ‡</sup> Lei*

*Cai,<sup>†</sup> Shenglong Wei,<sup>§</sup> Xue Zhang,<sup>※,\*</sup> Hongwei Liu<sup>†, ‡, ※,\*</sup>*

<sup>†</sup> State Key Laboratory of Mycology, Institute of Microbiology, Chinese Academy of Sciences, Beijing, 100101, People's Republic of China

<sup>‡</sup> Savaid Medical School, University of Chinese Academy of Sciences, Beijing, 100049, People's Republic of China

<sup>§</sup> Gansu Engineering Laboratory of Applied Mycology, Hexi University, Zhangye, 730400, People's Republic of China

<sup>※</sup> Key Laboratory of Structure-Based Drug Design & Discovery, Ministry of Education, Shenyang Pharmaceutical University, Shenyang, 110016, People's Republic of China

---

\* Corresponding Author

E-mail: liuhw@im.ac.cn (Hongwei Liu) and syzalice@163.com (Xue Zhang)

## Table of contents

|                                                                                                                                                       |    |
|-------------------------------------------------------------------------------------------------------------------------------------------------------|----|
| <b>Scheme S1</b> Biomimetic 1,4-Michael addition synthesis using 6-hydroxymethyl-eugenin as starting material.....                                    | 3  |
| <b>Figure S1</b> HPLC enantioseparation analysis of ( $\pm$ )-amplisins A-D.....                                                                      | 4  |
| <b>Figure S2</b> Experimental and calculated ECD spectra of (+)- <b>1</b> and (-)- <b>1</b> in methanol.....                                          | 5  |
| <b>Figure S3</b> Structures of conformers of ( <i>S</i> )- <b>1</b> at b3lyp/6-311+g (d) level in methanol with the PCM model.....                    | 6  |
| <b>Figure S4</b> Production of compound <b>9</b> via 1,4-Michael addition reaction of compound <b>7</b> and acetylacetone at different pH values..... | 7  |
| <b>Figure S5</b> Anti-inflammatory bioactivity of compounds <b>1-7</b> .....                                                                          | 8  |
| <b>Figure S6</b> HRESIMS spectra of compounds <b>1-5</b> (a-e).....                                                                                   | 9  |
| <b>Figure S7</b> <sup>1</sup> H NMR spectrum of compound <b>1</b> in CDCl <sub>3</sub> (500 MHz).....                                                 | 10 |
| <b>Figure S8</b> <sup>13</sup> C NMR spectrum of compound <b>1</b> in CDCl <sub>3</sub> (125 MHz).....                                                | 11 |
| <b>Figure S9</b> HSQC spectrum of compound <b>1</b> in CDCl <sub>3</sub> .....                                                                        | 12 |
| <b>Figure S10</b> HMBC spectrum of compound <b>1</b> in CDCl <sub>3</sub> .....                                                                       | 13 |
| <b>Figure S11</b> <sup>1</sup> H NMR spectrum of compound <b>2</b> in CDCl <sub>3</sub> (500 MHz).....                                                | 14 |
| <b>Figure S12</b> <sup>13</sup> C NMR spectrum of compound <b>2</b> in CDCl <sub>3</sub> (125 MHz).....                                               | 15 |
| <b>Figure S13</b> HSQC spectrum of compound <b>2</b> in CDCl <sub>3</sub> .....                                                                       | 16 |
| <b>Figure S14</b> HMBC spectrum of compound <b>2</b> in CDCl <sub>3</sub> .....                                                                       | 17 |
| <b>Figure S15</b> <sup>1</sup> H NMR spectrum of compound <b>3</b> in DMSO- <i>d</i> <sub>6</sub> (500 MHz).....                                      | 18 |
| <b>Figure S16</b> <sup>13</sup> C NMR spectrum of compound <b>3</b> in DMSO- <i>d</i> <sub>6</sub> (125 MHz).....                                     | 19 |
| <b>Figure S17</b> HSQC spectrum of compound <b>3</b> in DMSO- <i>d</i> <sub>6</sub> .....                                                             | 20 |
| <b>Figure S18</b> HMBC spectrum of compound <b>3</b> in DMSO- <i>d</i> <sub>6</sub> .....                                                             | 21 |
| <b>Figure S19</b> <sup>1</sup> H NMR spectrum of compound <b>4</b> in CDCl <sub>3</sub> (500 MHz).....                                                | 22 |
| <b>Figure S20</b> <sup>13</sup> C NMR spectrum of compound <b>4</b> in CDCl <sub>3</sub> (125 MHz).....                                               | 23 |
| <b>Figure S21</b> HSQC spectrum of compound <b>4</b> in CDCl <sub>3</sub> .....                                                                       | 24 |
| <b>Figure S22</b> HMBC spectrum of compound <b>4</b> in CDCl <sub>3</sub> .....                                                                       | 25 |
| <b>Figure S23</b> <sup>1</sup> H NMR spectrum of compound <b>5</b> in CDCl <sub>3</sub> (500 MHz).....                                                | 26 |
| <b>Figure S24</b> <sup>13</sup> C NMR spectrum of compound <b>5</b> in CDCl <sub>3</sub> (125 MHz).....                                               | 27 |
| <b>Figure S25</b> HSQC spectrum of compound <b>5</b> in CDCl <sub>3</sub> .....                                                                       | 28 |
| <b>Figure S26</b> HMBC spectrum of compound <b>5</b> in CDCl <sub>3</sub> .....                                                                       | 29 |
| <b>Figure S27</b> <sup>1</sup> H NMR spectrum of compound <b>9</b> in CDCl <sub>3</sub> (500 MHz).....                                                | 30 |
| <b>Figure S28</b> <sup>13</sup> C NMR spectrum of compound <b>9</b> in CDCl <sub>3</sub> (125 MHz).....                                               | 31 |
| <b>Figure S29</b> <sup>1</sup> H NMR spectrum of compound <b>10</b> in CDCl <sub>3</sub> (500 MHz).....                                               | 32 |
| <b>Figure S30</b> <sup>13</sup> C NMR spectrum of compound <b>10</b> in CDCl <sub>3</sub> (125 MHz).....                                              | 33 |
| <b>Figure S31</b> <sup>1</sup> H NMR spectrum of compound <b>11</b> in CDCl <sub>3</sub> (500 MHz).....                                               | 34 |
| <b>Figure S32</b> <sup>13</sup> C NMR spectrum of compound <b>11</b> in CDCl <sub>3</sub> (125 MHz).....                                              | 35 |

**Scheme S1** Biomimetic 1,4-Michael addition synthesis using 6-hydroxymethyl-eugenin as starting material

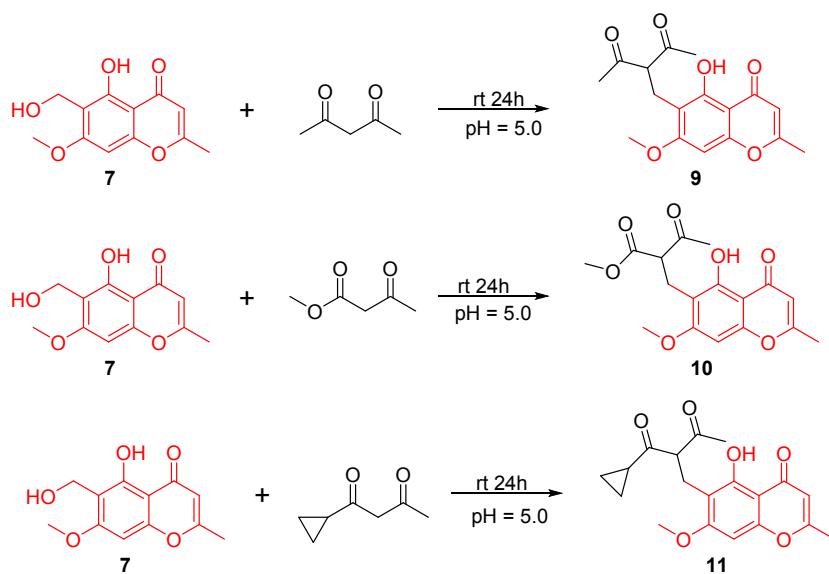

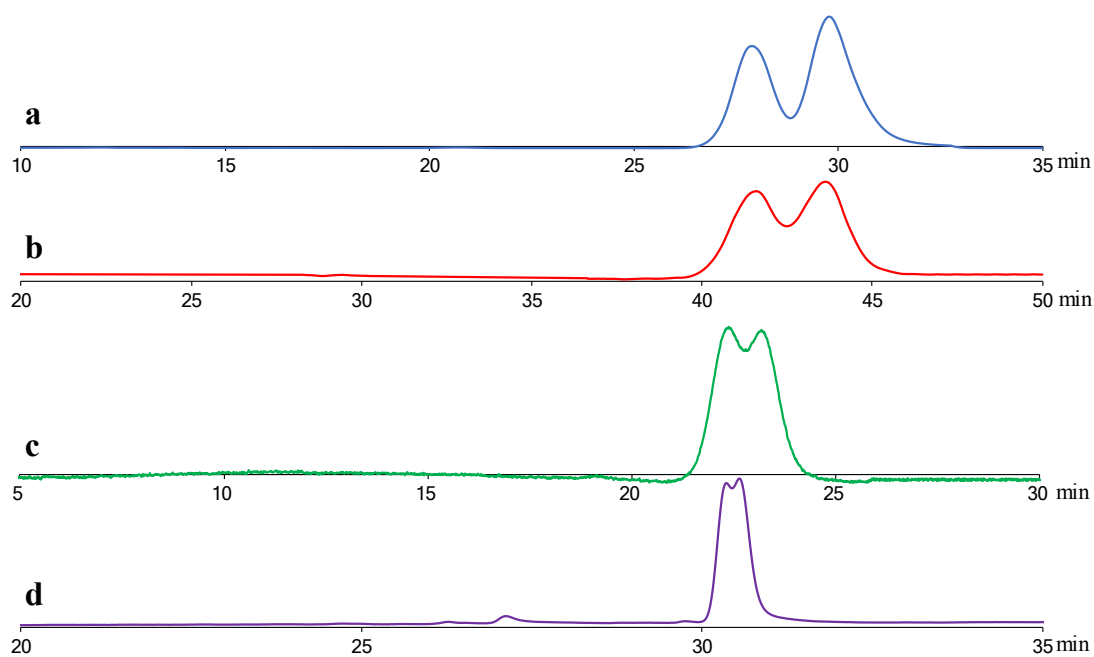

**Figure S1** HPLC enantioseparation analysis of (±)-amplisins A-D

Enantioseparation analysis of (±)-amplisins A -D were performed on Shimadzu LC-20AT system equipped with Kromasil 5-CelluCoat column ( $4.6 \times 250$  mm,  $5 \mu\text{m}$ ). The column oven was  $40^\circ\text{C}$ , detector wavelength was  $254$  nm and injection volume were  $10 \mu\text{L}$ . Acetonitrile/water was used as eluent. The elution conditions were 45% acetonitrile and 55% water for (±)-amplisin A ( $t_{\text{R}} = 28.2$  and  $29.6$  min, **a**), 52% acetonitrile and 48% water for (±)-amplisin B ( $t_{\text{R}} = 41.8$  and  $43.8$  min, **b**), 58% acetonitrile and 42% water for (±)-amplisin C ( $t_{\text{R}} = 22.1$  and  $23.2$  min, **c**), and 40% acetonitrile and 60% water for (±)-amplisin D ( $t_{\text{R}} = 30.3$  and  $30.6$  min, **d**) at a flow rate,  $1$  mL/min.

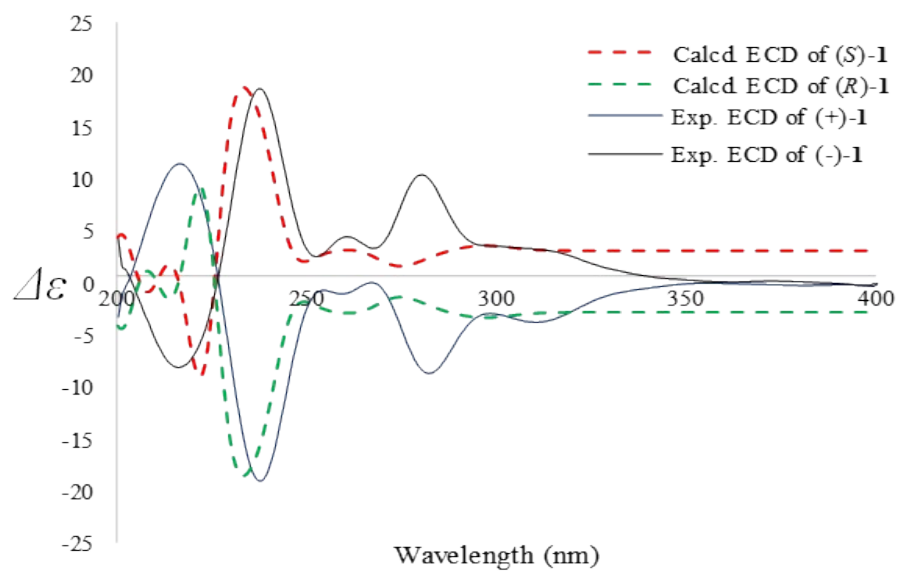

**Figure S2** Experimental and calculated ECD spectra of (+)-1 and (-)-1 in methanol

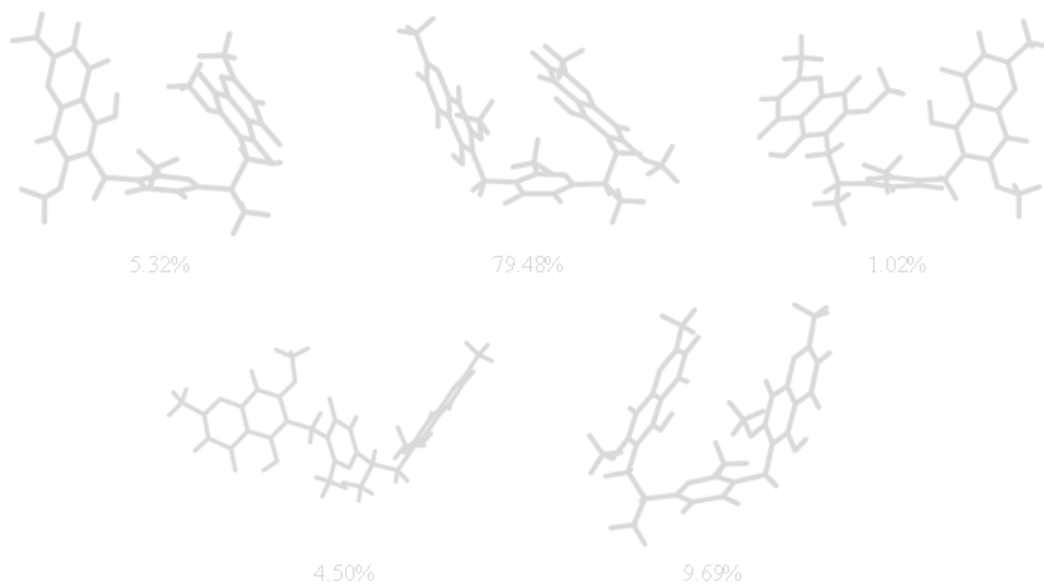

**Figure S3** Structures of conformers of (*S*)-**1** at b3lyp/6-311+g (d) level in methanol with the PCM model

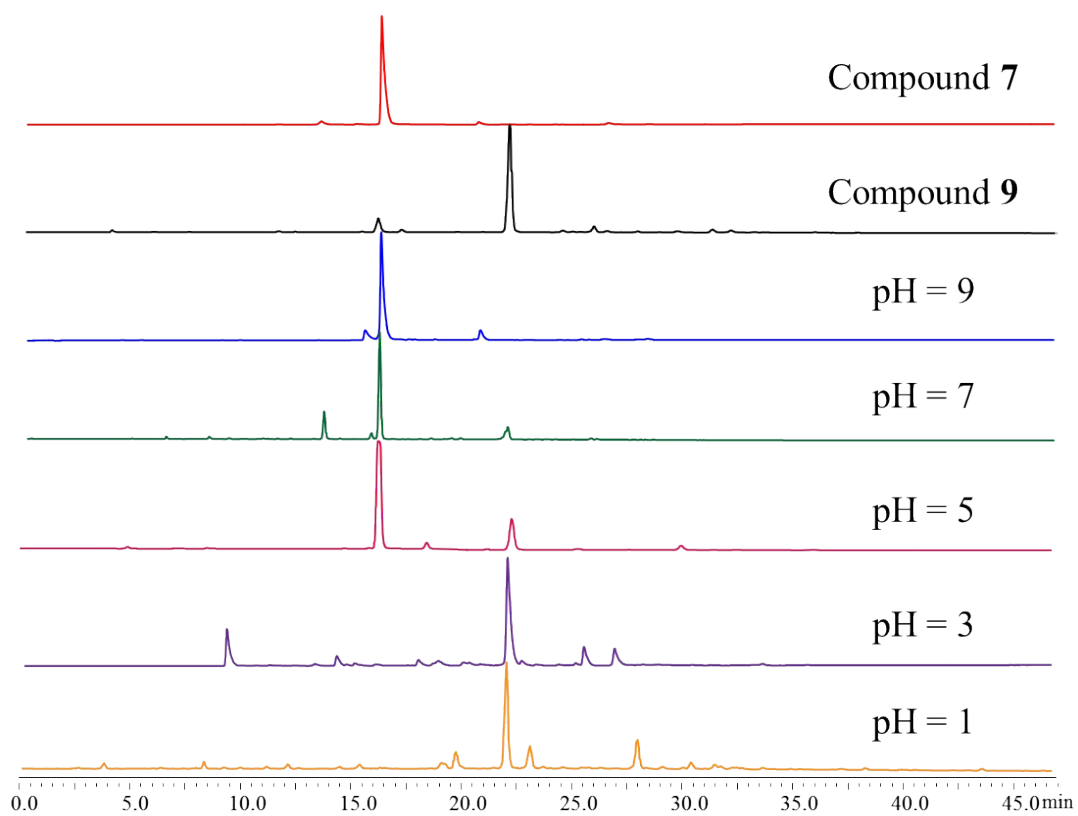

**Figure S4** Production of compound **9** via 1,4-Michael addition reaction of compound **7** and acetylacetone at different pH values

Analysis method, column is YMC-pack ODS-A, flow rate is 1 mL/min, temperature is 40 °C, injection volume is 10  $\mu$ L, moving phases are MeCN (A) and water with 0.01% TFA (B), procedure is 5% A (0 min) -100% A (30 min) -100% A (50 min), detector wavelength are 210 nm and 254 nm

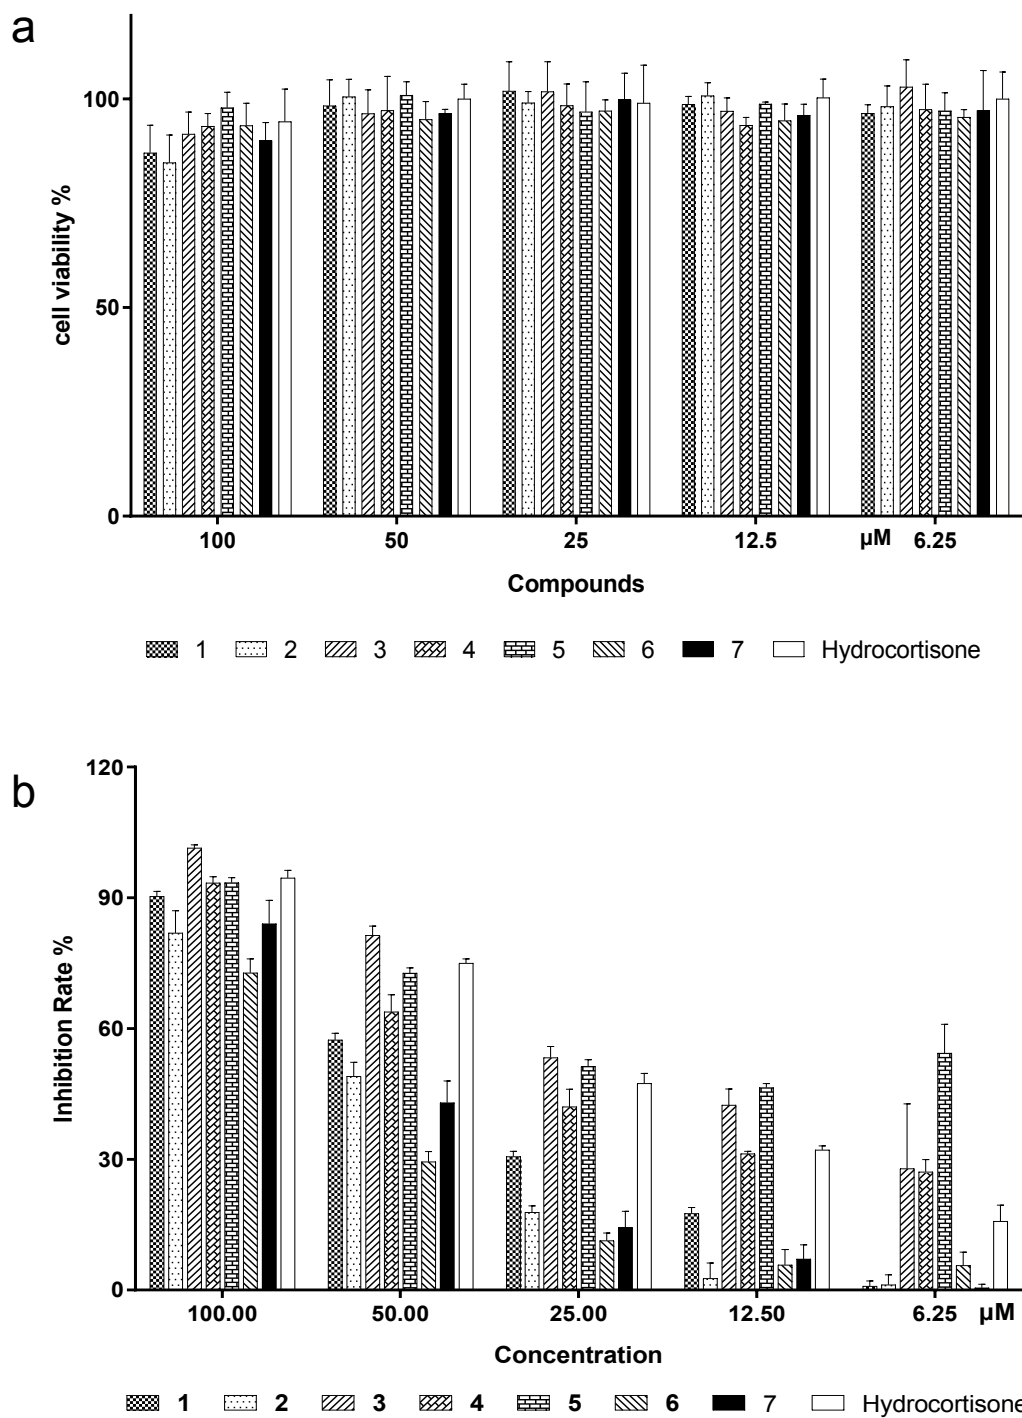

**Figure S5** Anti-inflammatory bioactivity of compounds 1-7

a. Cell viability of RAW 264.7 cells after treated by compounds 1-7; b. inhibitory activity on the NO release in LPS-induced RAW 264.7 cells



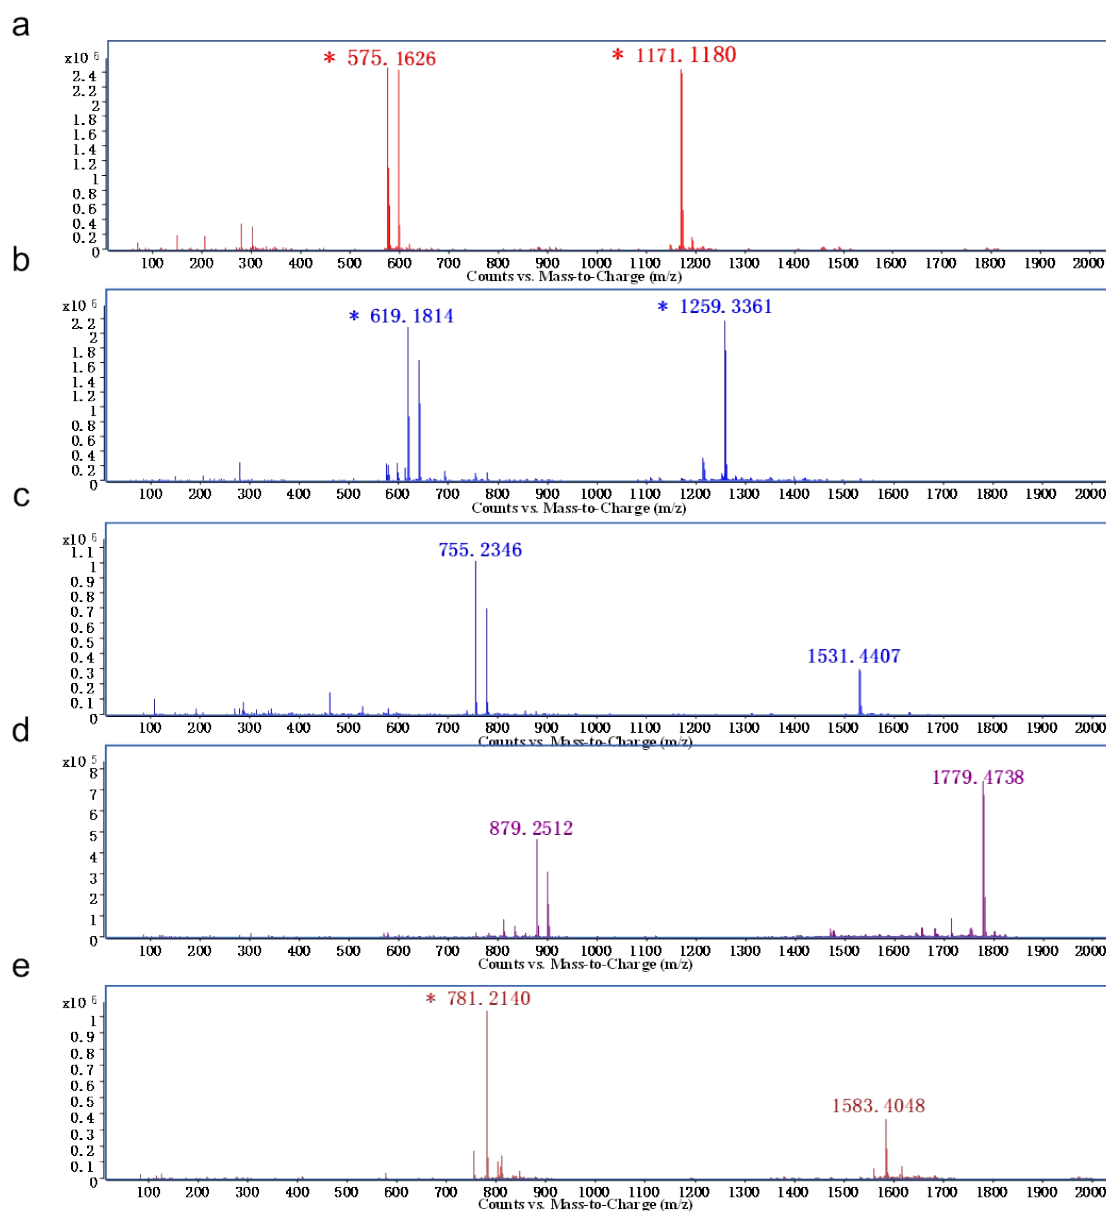

**Figure S6** HRESIMS spectra of compounds **1-5** (a-e)

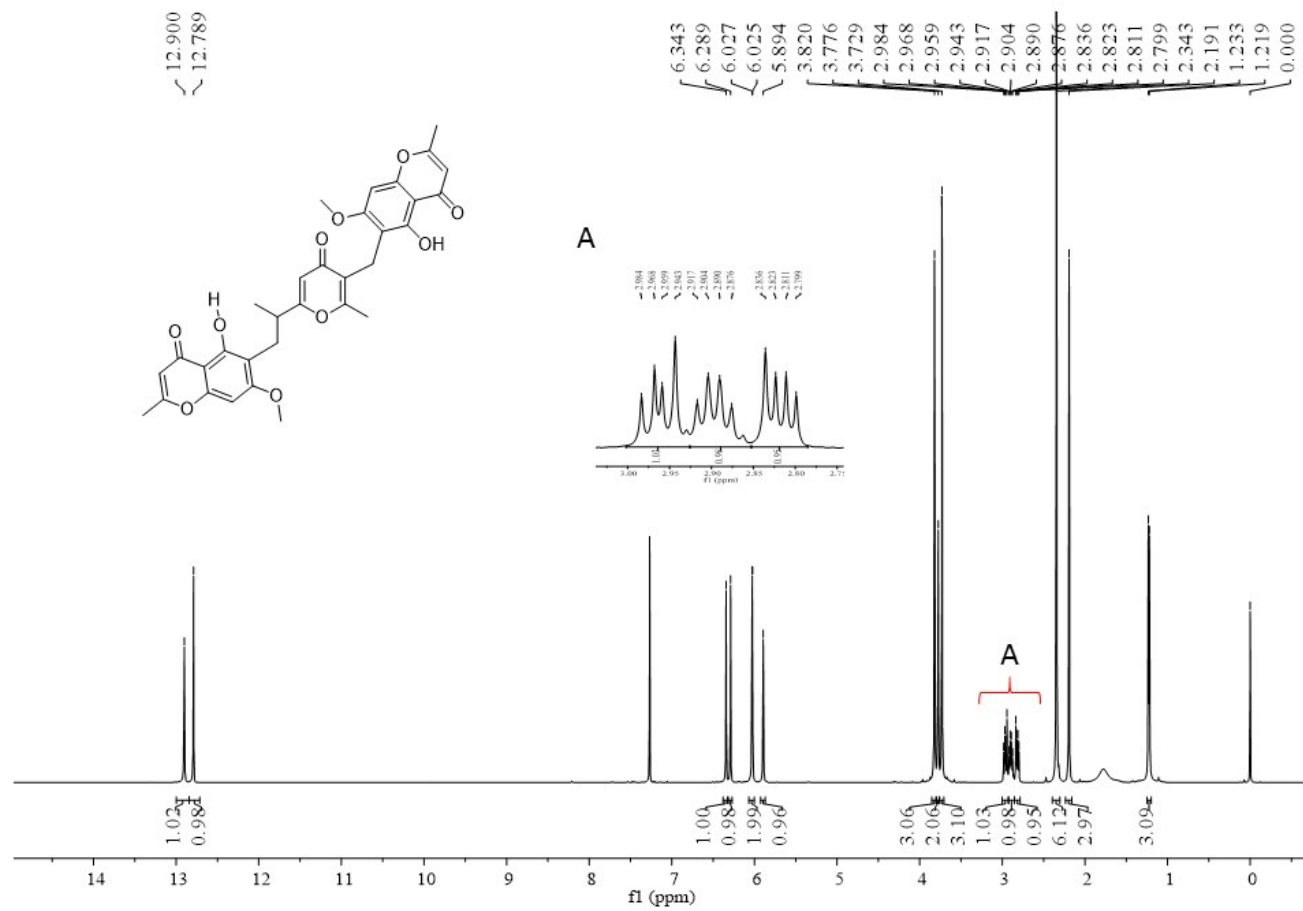

**Figure S7** <sup>1</sup>H NMR spectrum of compound 1 in CDCl<sub>3</sub> (500 MHz)



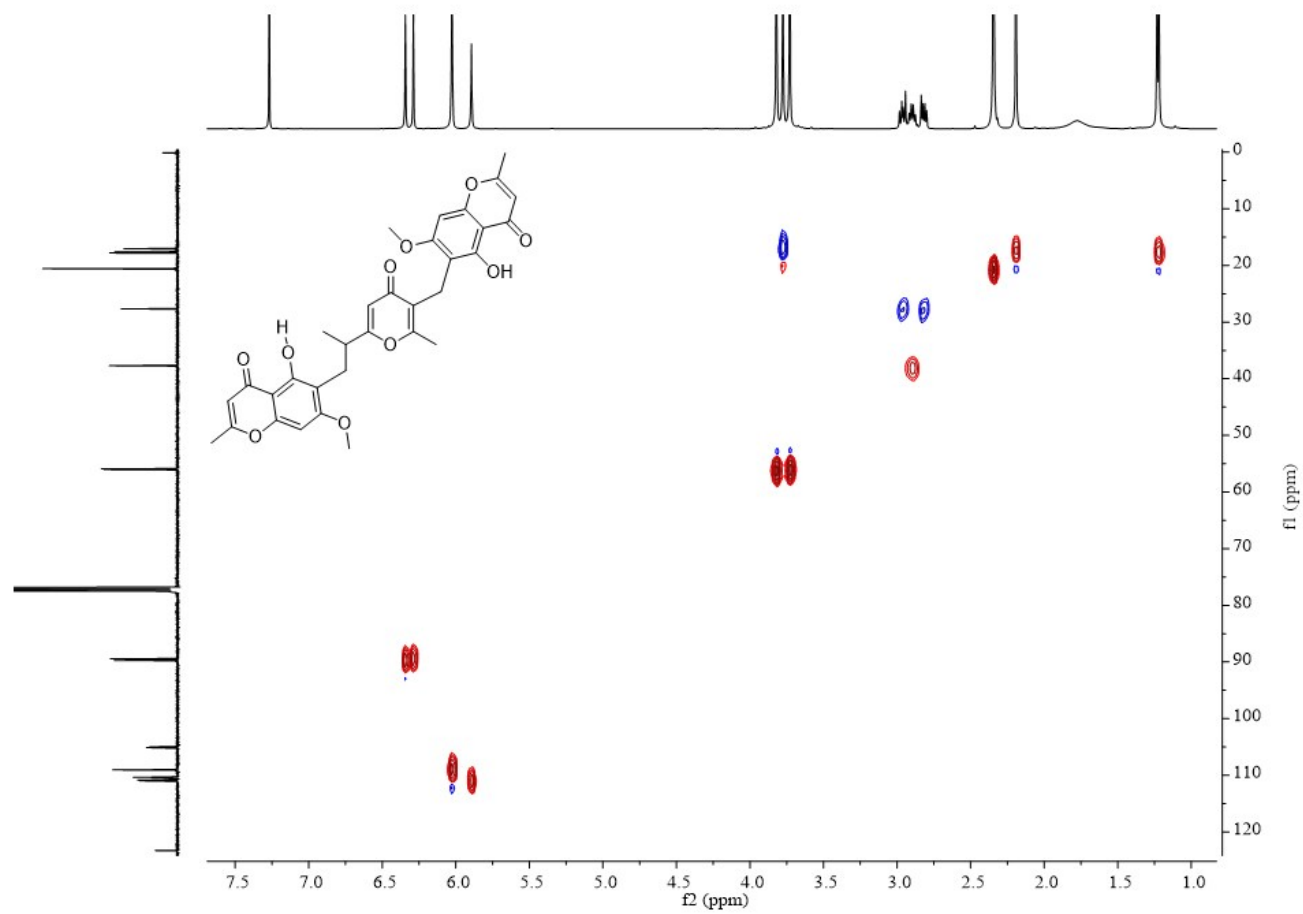

**Figure S9** HSQC spectrum of compound **1** in  $\text{CDCl}_3$

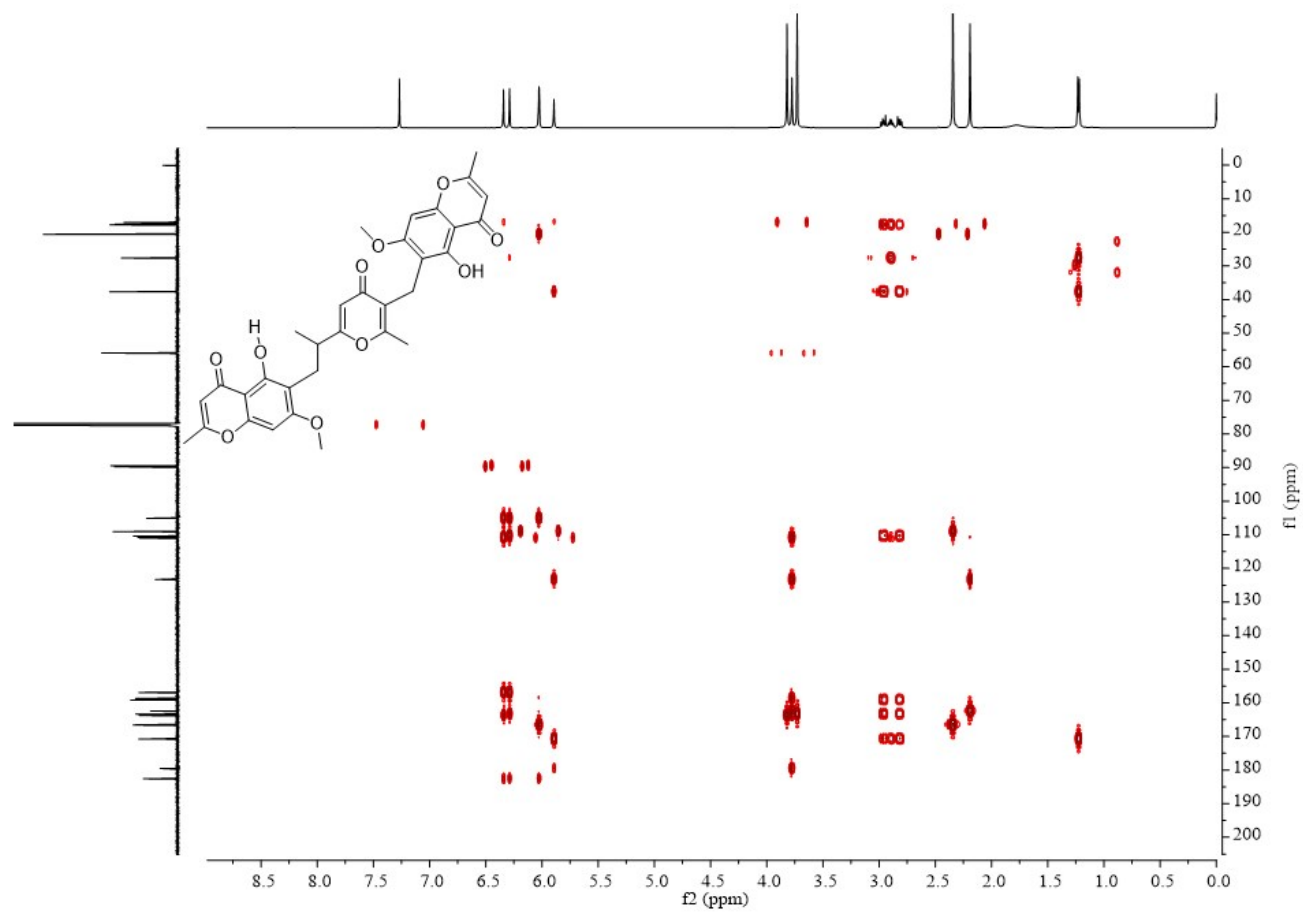

**Figure S10** HMBC spectrum of compound **1** in CDCl<sub>3</sub>

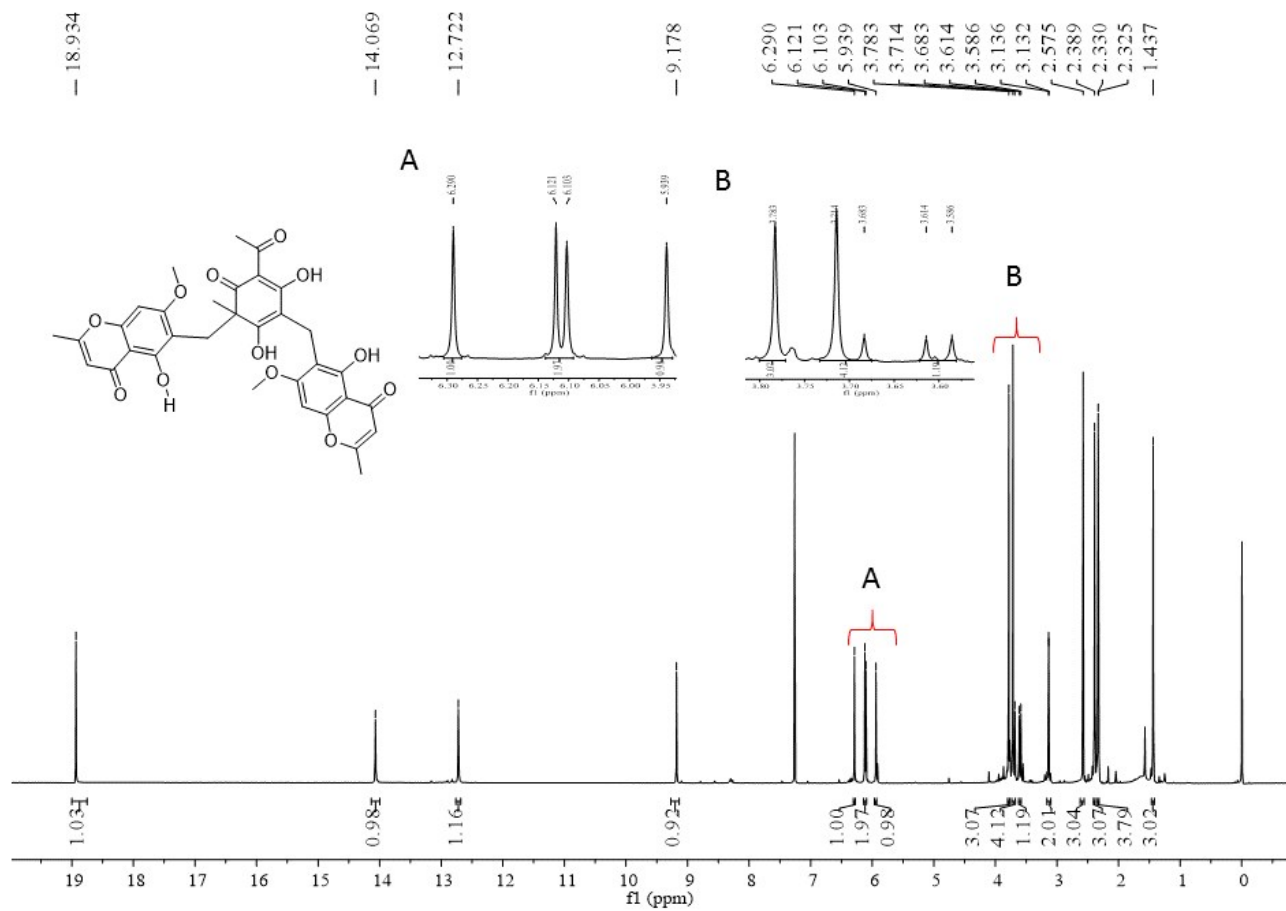

**Figure S11**  $^1\text{H}$  NMR spectrum of compound **2** in  $\text{CDCl}_3$  (500 MHz)

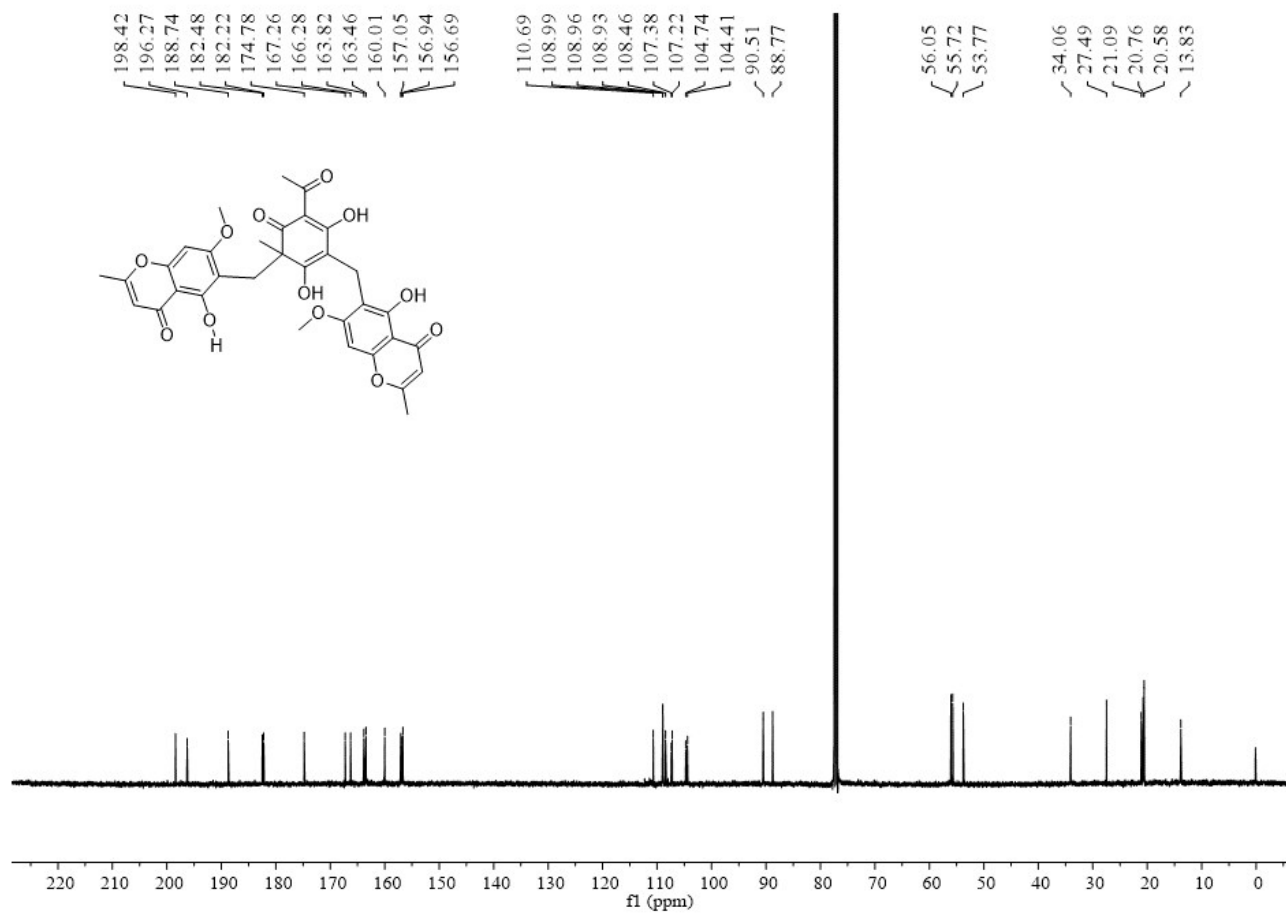

**Figure S12** <sup>13</sup>C NMR spectrum of compound **2** in CDCl<sub>3</sub> (125 MHz)

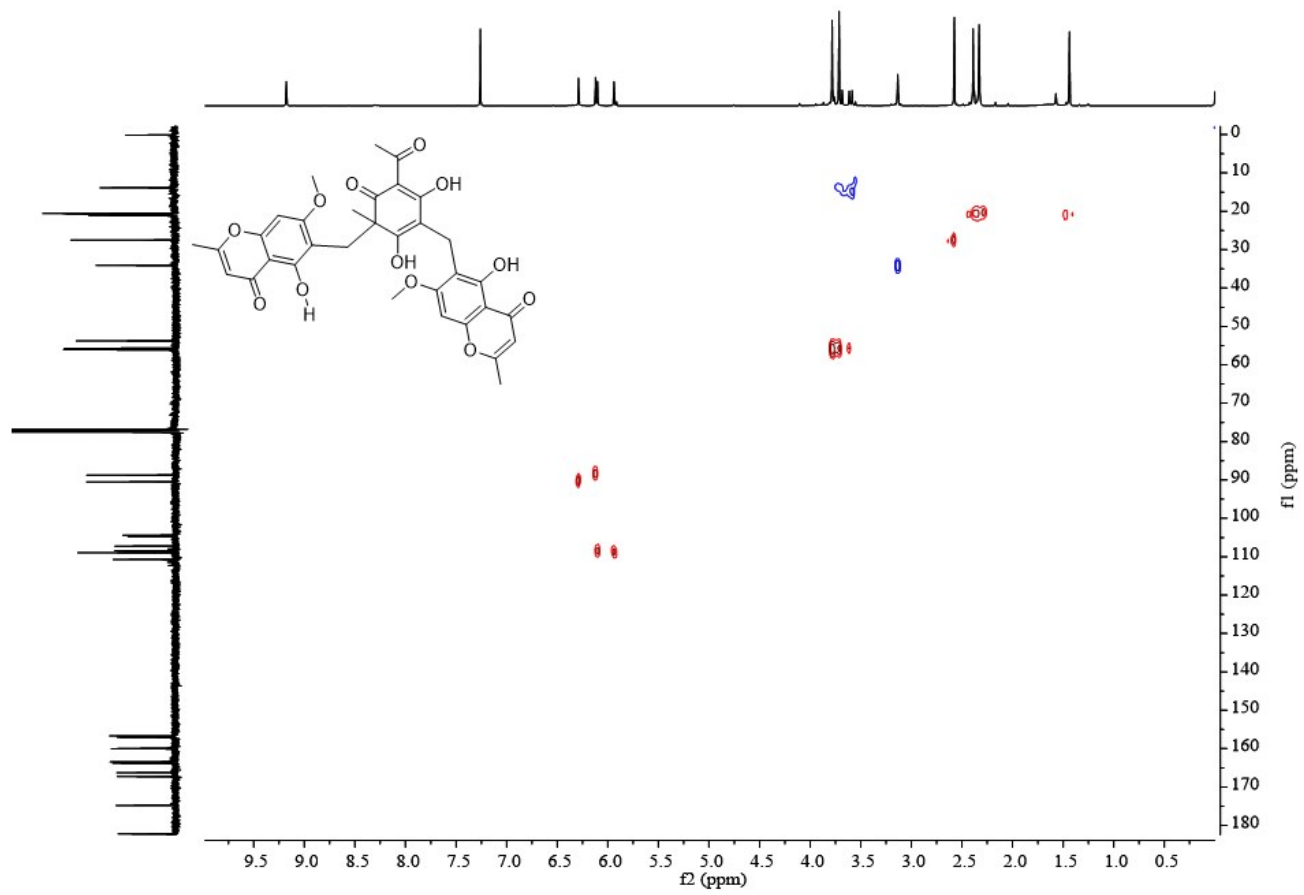

Figure S13 HSQC spectrum of compound 2 in CDCl<sub>3</sub>



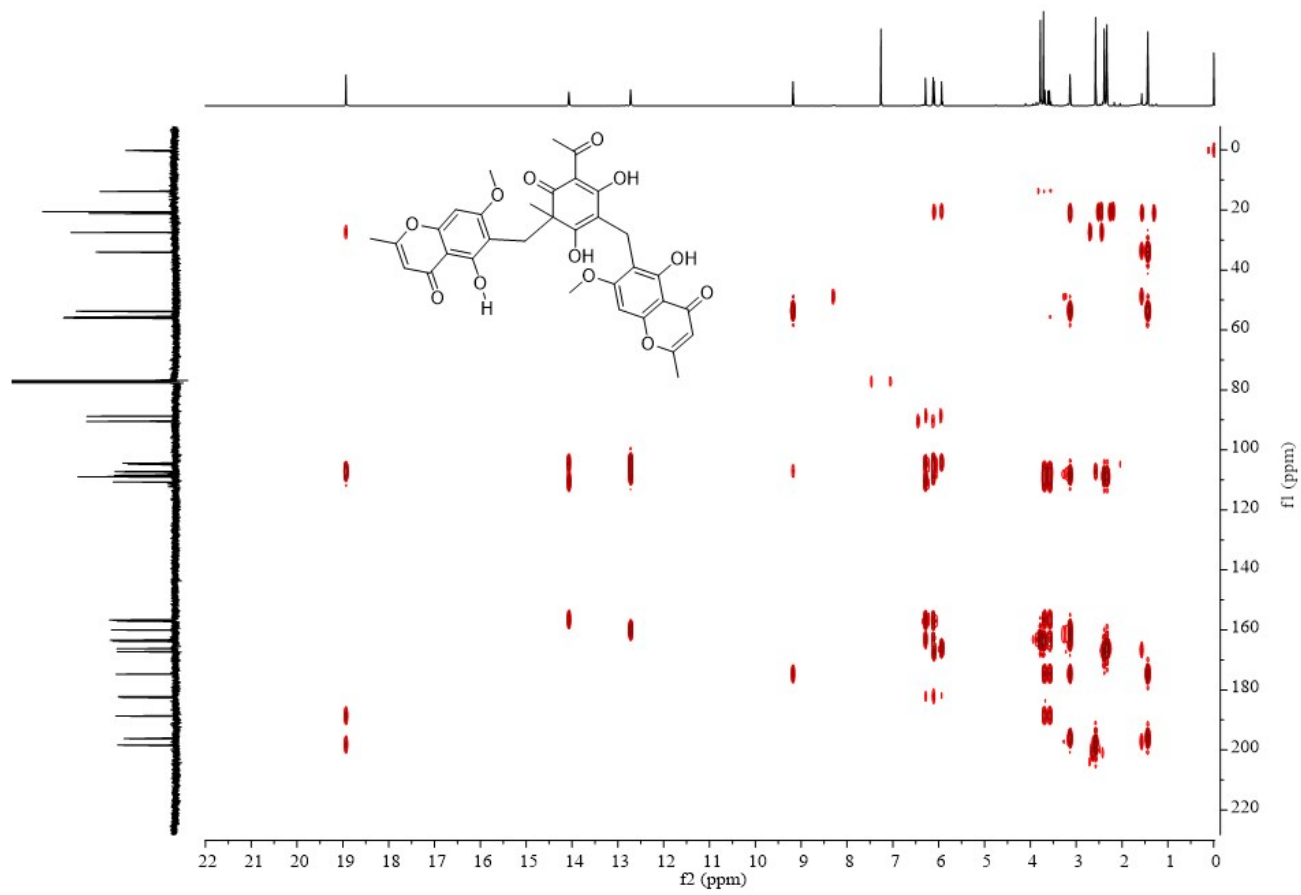

**Figure S14** HMBC spectrum of compound **2** in CDCl<sub>3</sub>

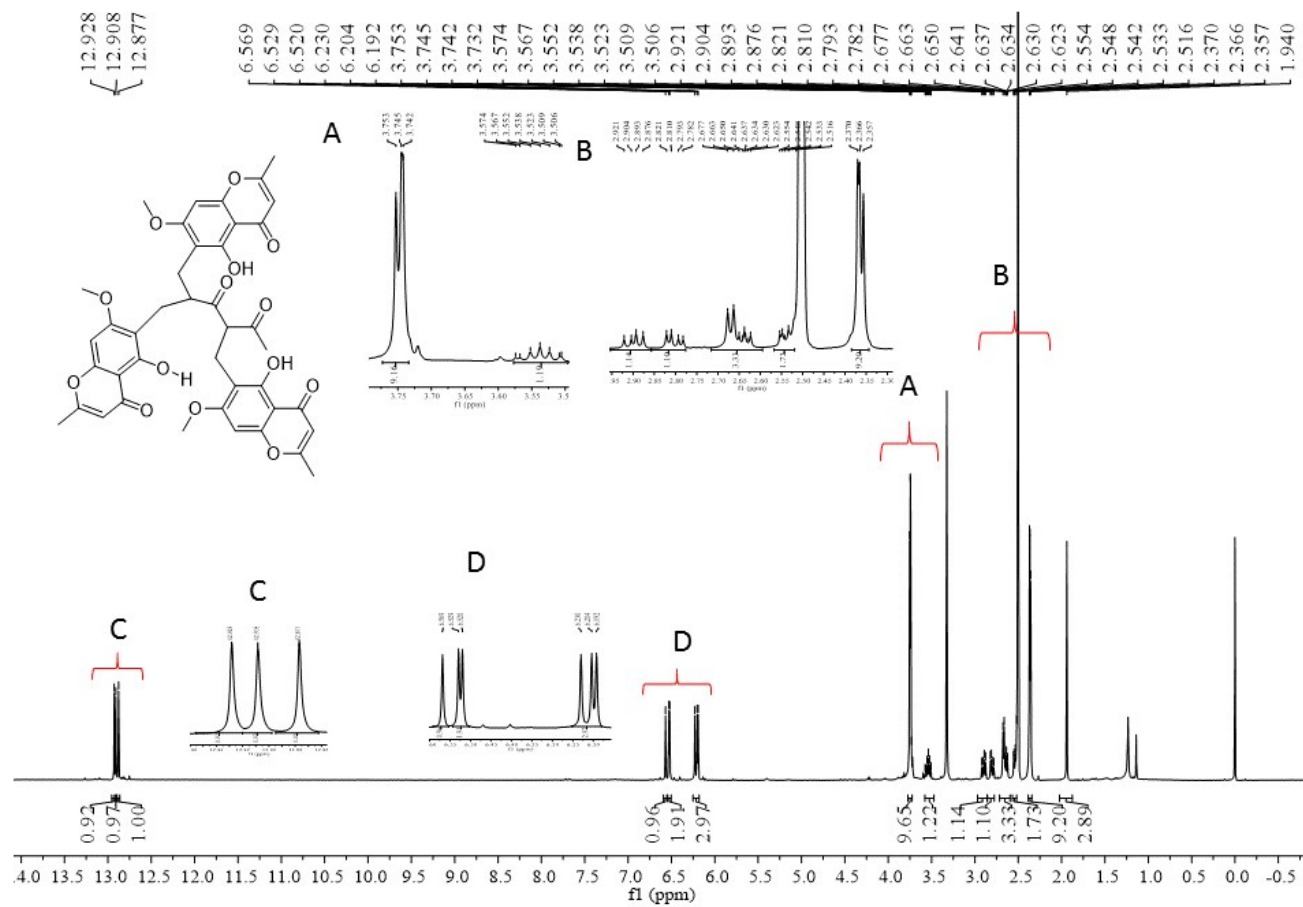

Figure S15 <sup>1</sup>H NMR spectrum of compound 3 in DMSO-*d*<sub>6</sub> (500 MHz)

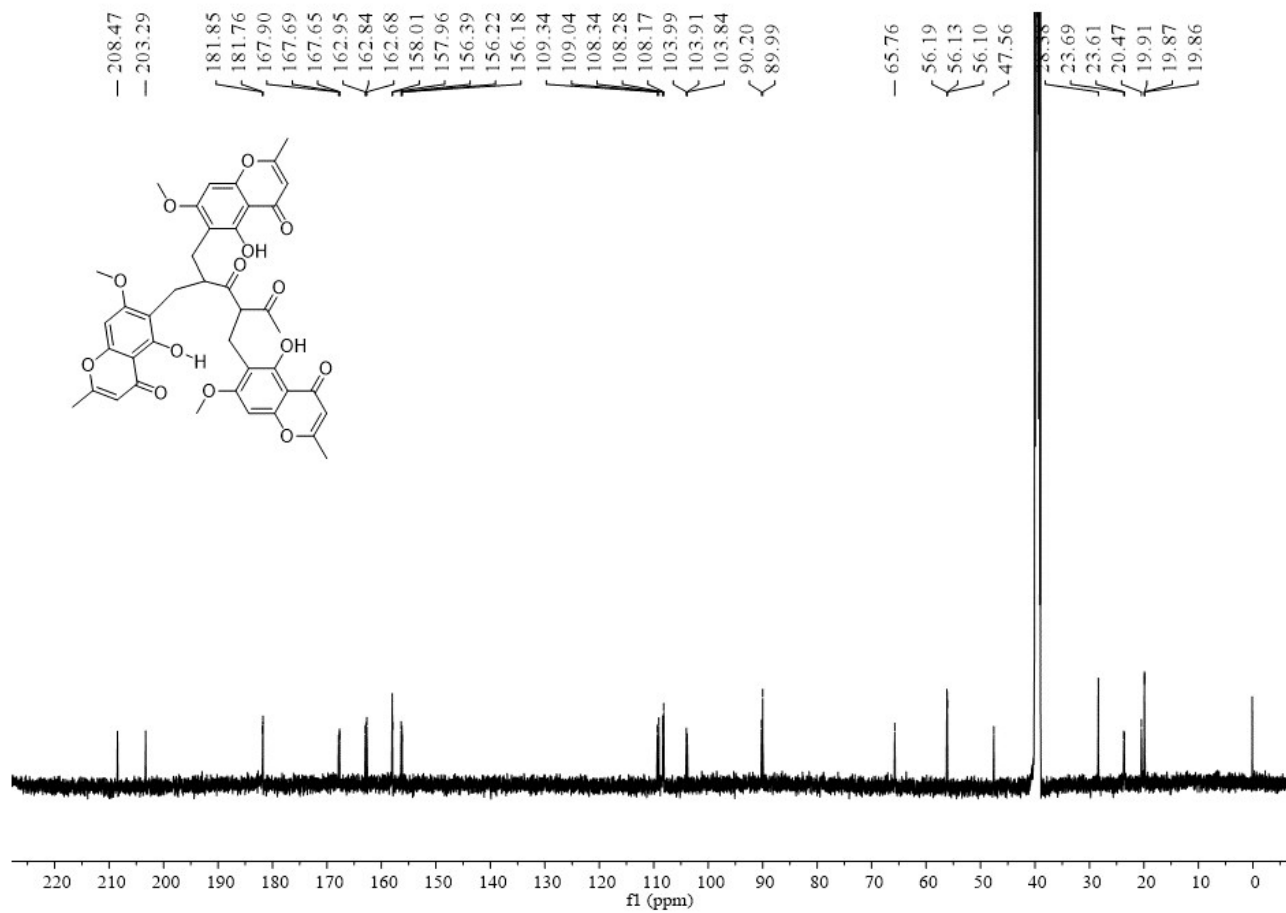

**Figure S16**  $^{13}\text{C}$  NMR spectrum of compound 3 in  $\text{DMSO-}d_6$  (125 MHz)

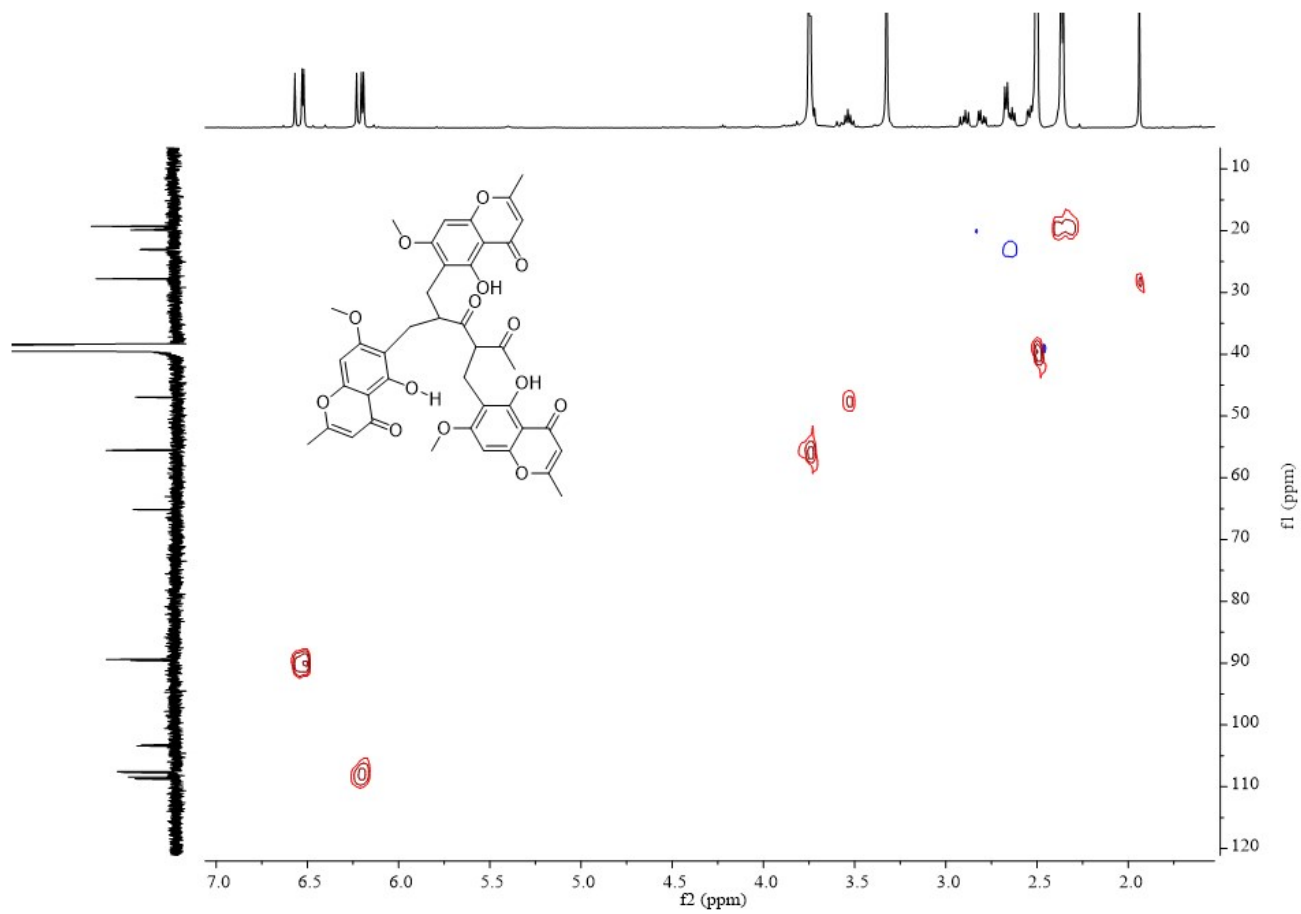

**Figure S17** HSQC spectrum of compound **3** in DMSO- $d_6$

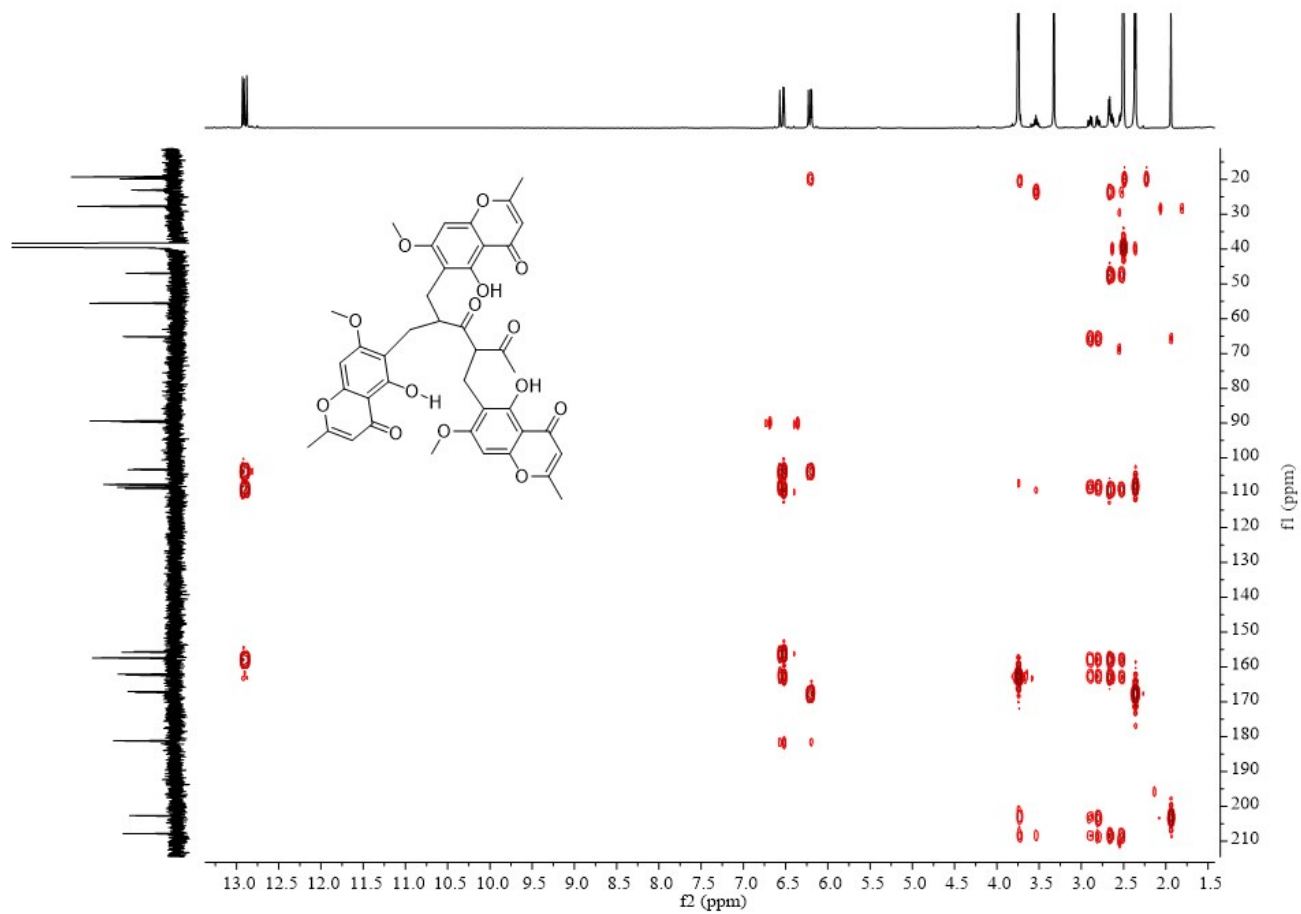

Figure S18 HMBC spectrum of compound 3 in DMSO- $d_6$



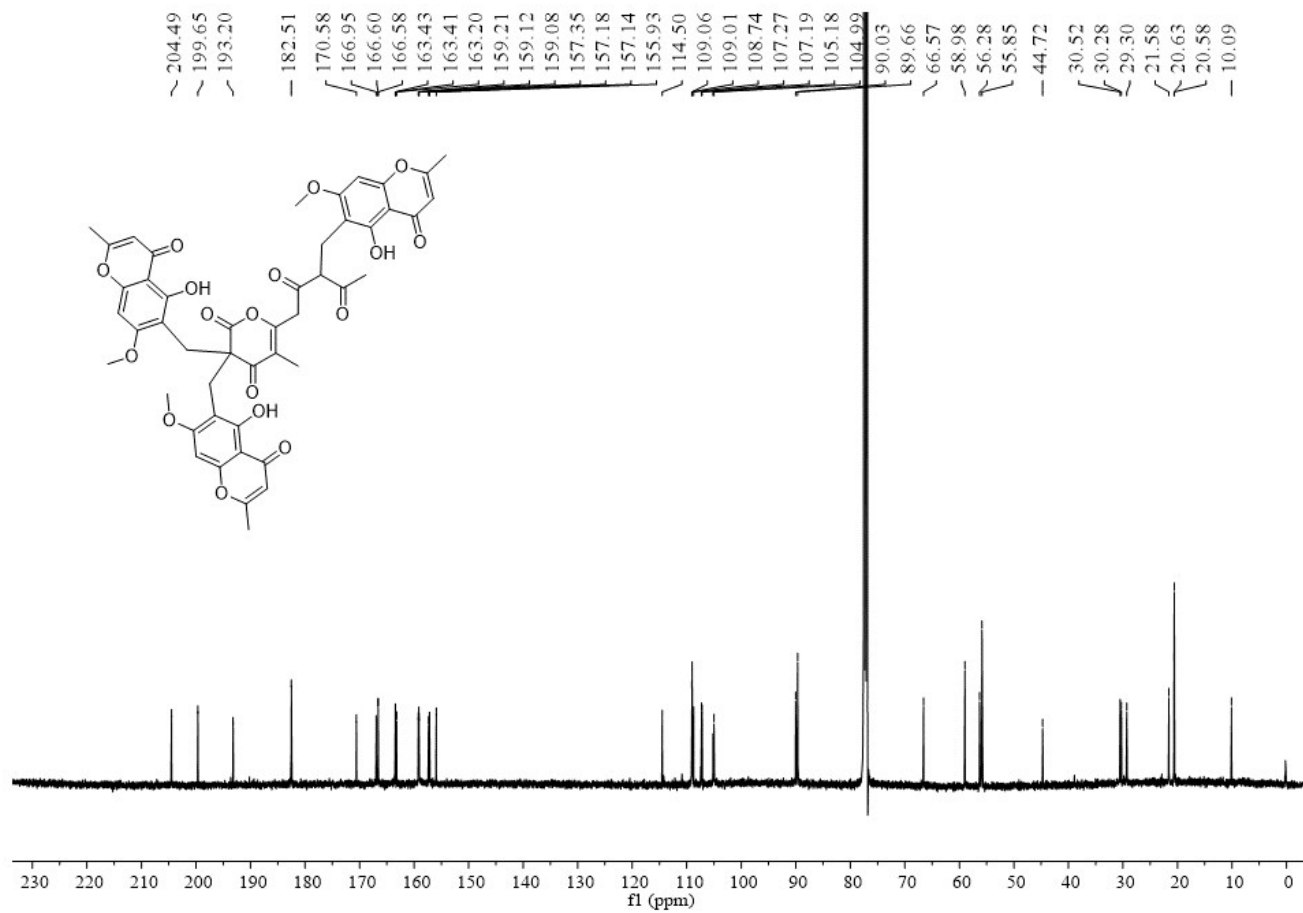

**Figure S20**  $^{13}\text{C}$  NMR spectrum of compound **4** in  $\text{CDCl}_3$  (125 MHz)

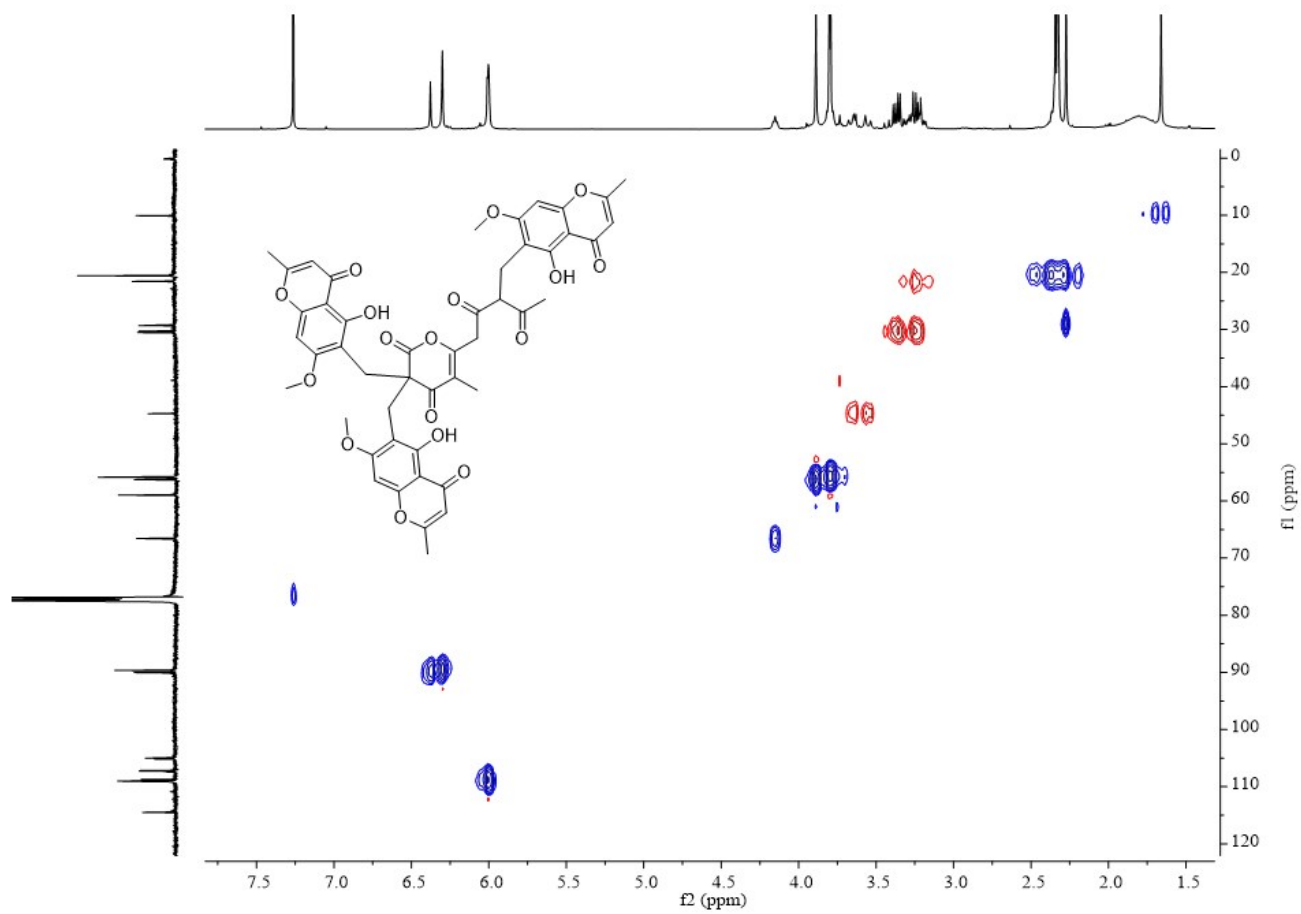

Figure S21 HSQC spectrum of compound 4 in CDCl<sub>3</sub>



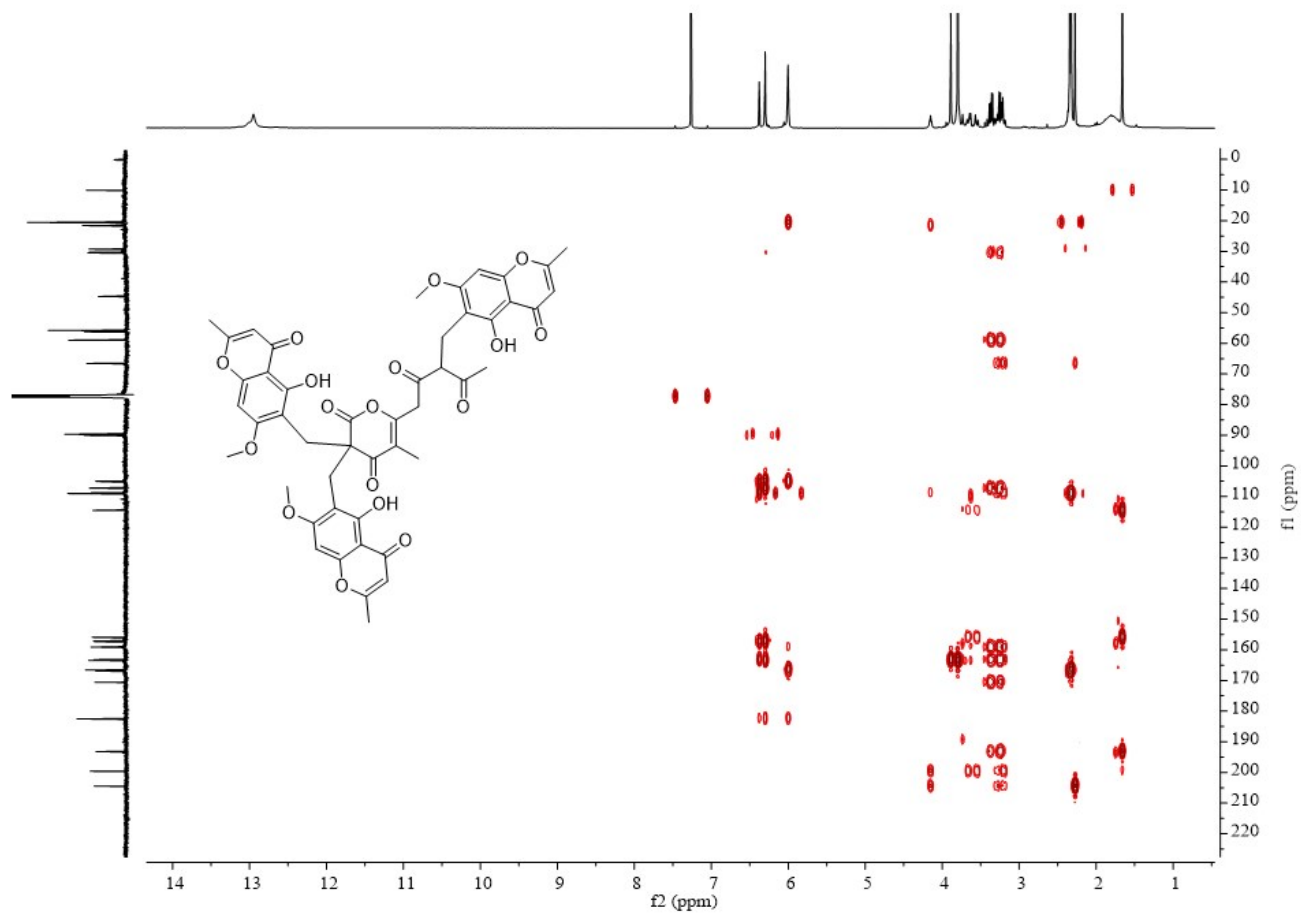

Figure S22 HMBC spectrum of compound 4 in CDCl<sub>3</sub>

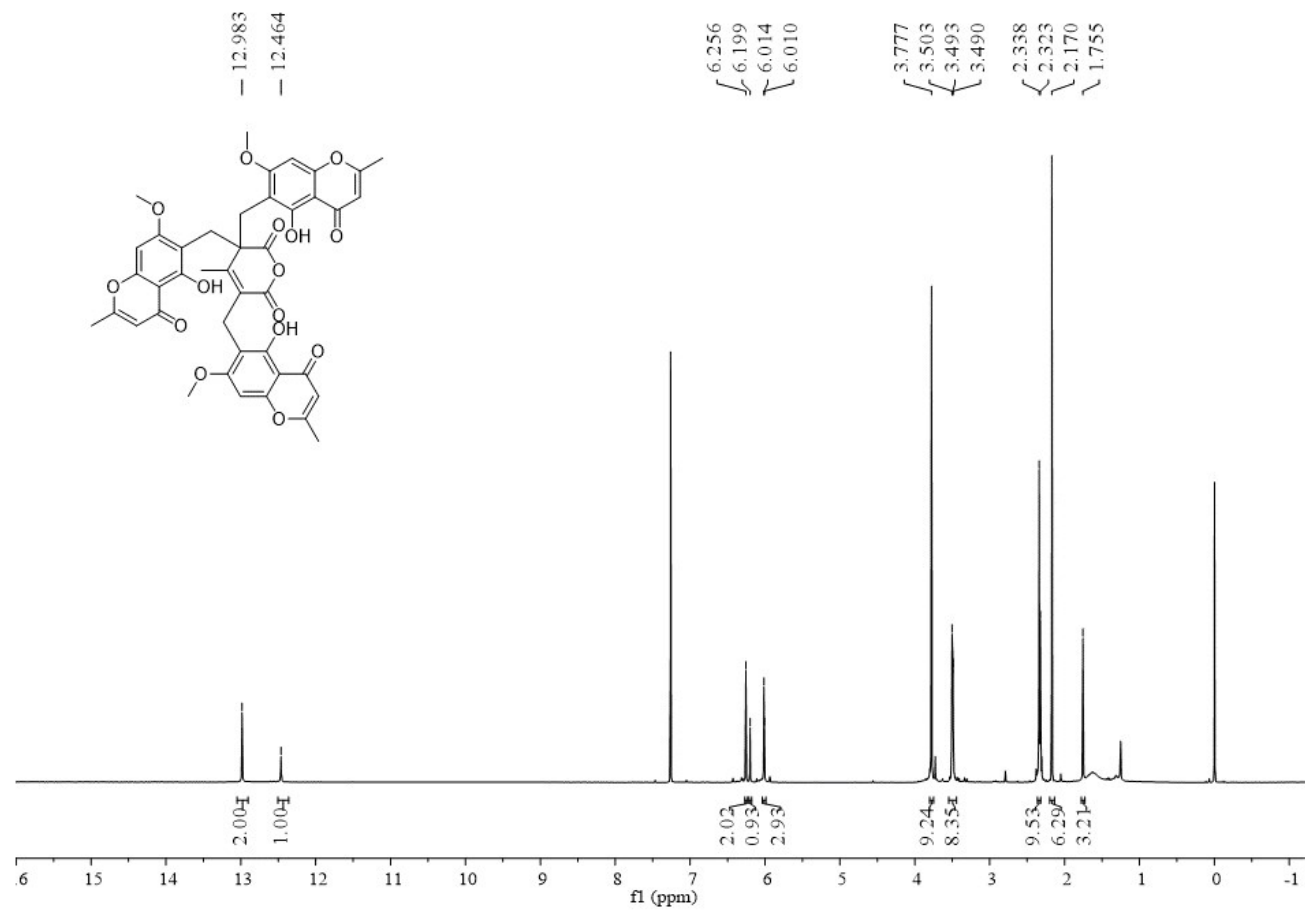

**Figure S23** <sup>1</sup>H NMR spectrum of compound **5** in CDCl<sub>3</sub> (500 MHz)

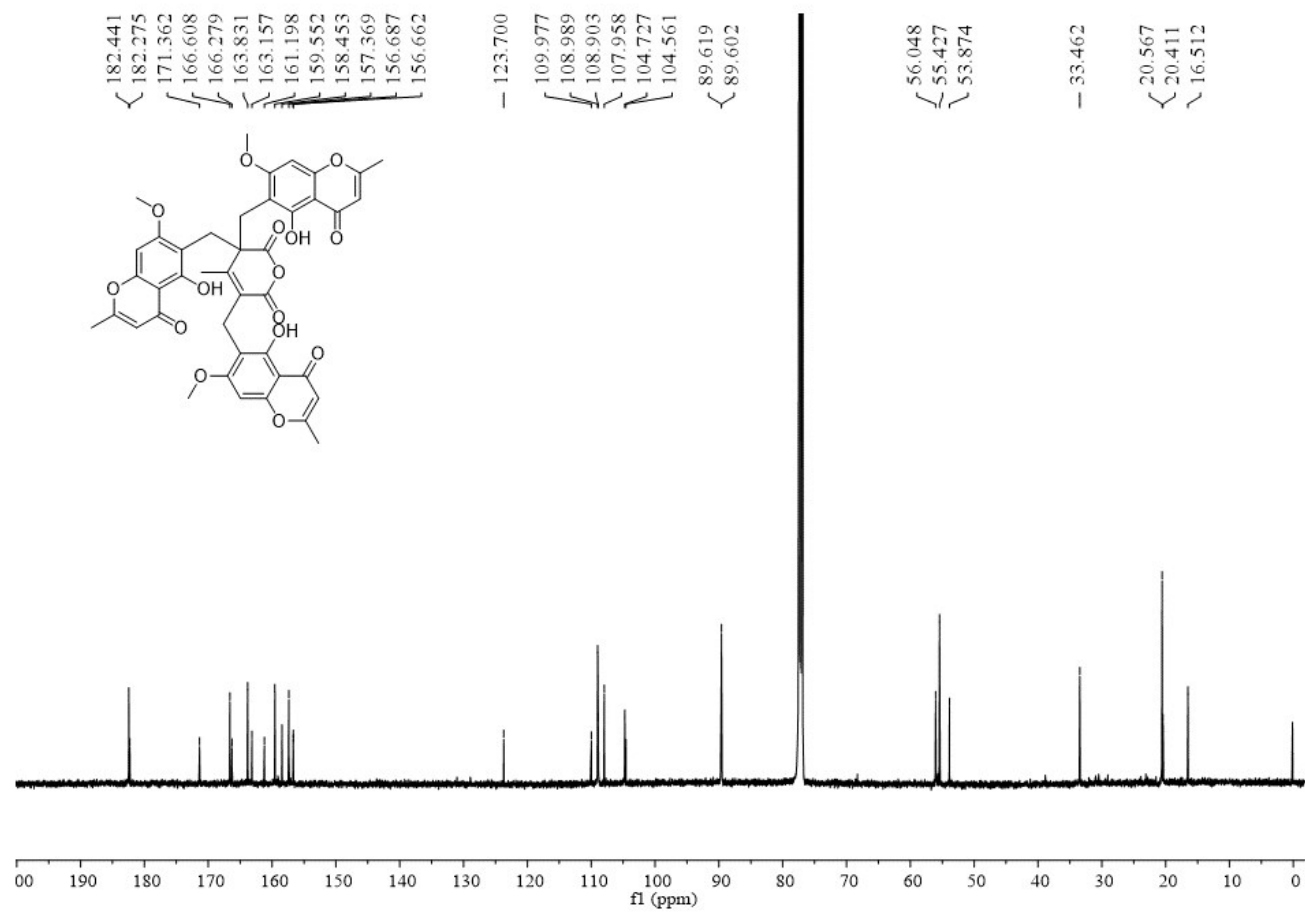

**Figure S24**  $^{13}\text{C}$  NMR spectrum of compound **5** in  $\text{CDCl}_3$  (125 MHz)

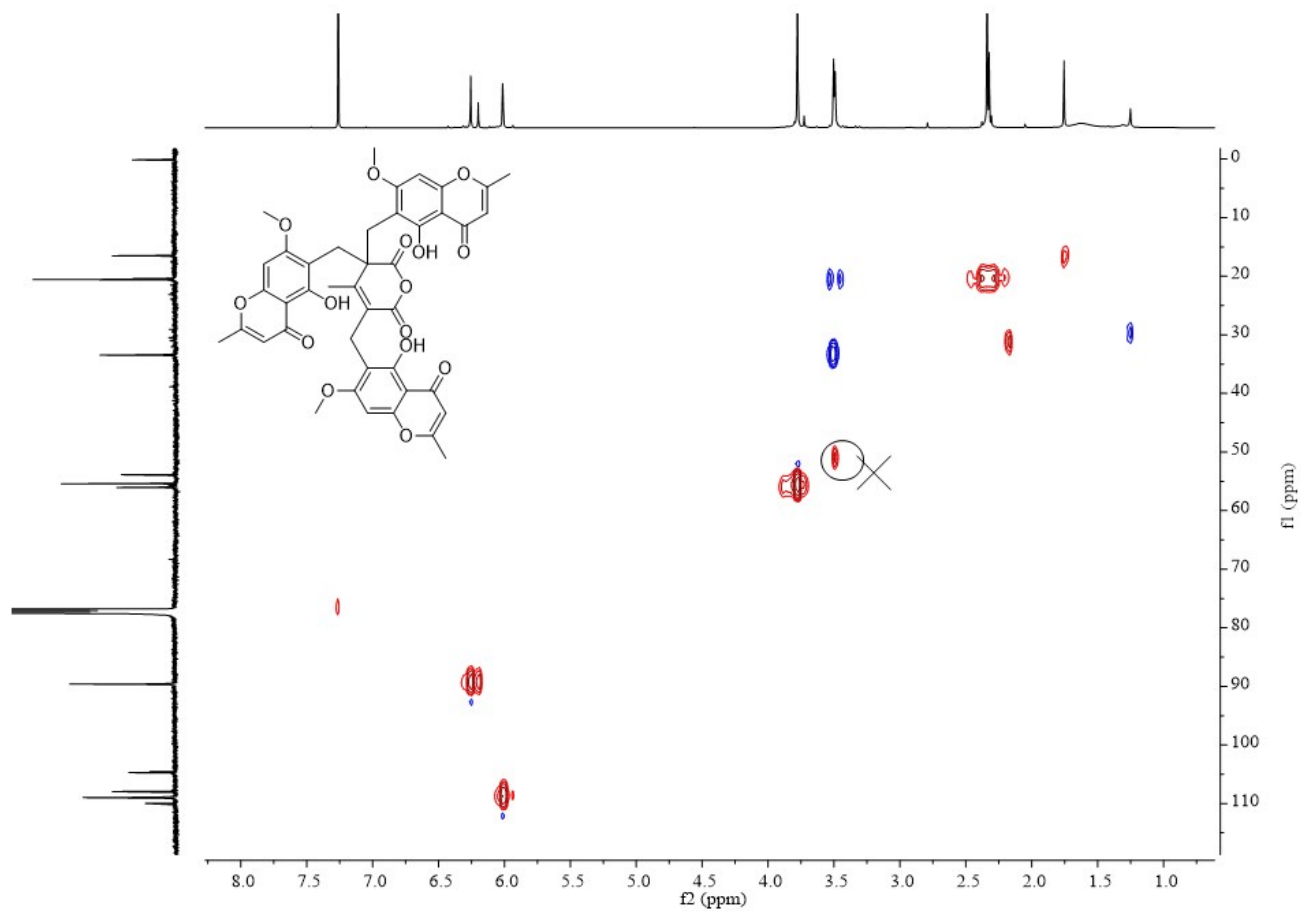

Figure S25 HSQC spectrum of compound 5 in CDCl<sub>3</sub>

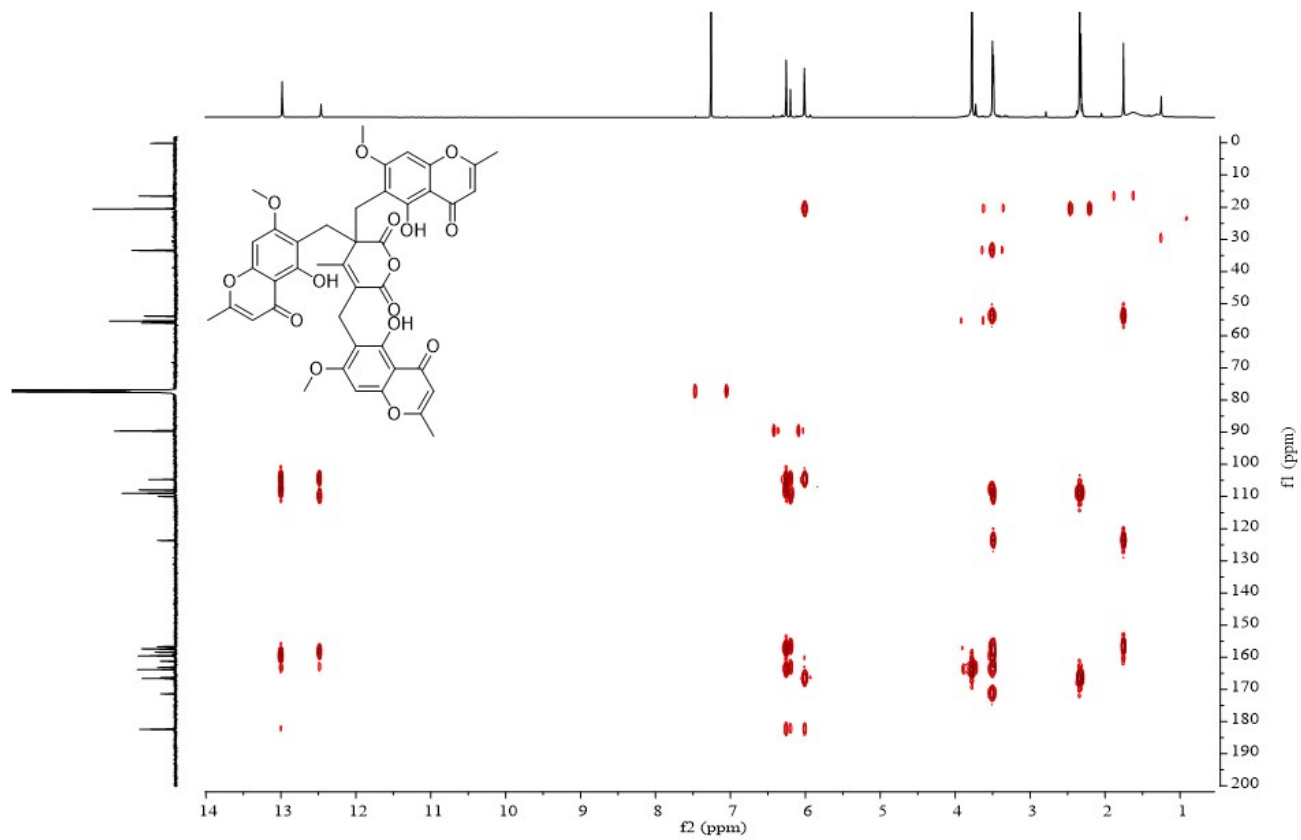

**Figure S26** HMBC spectrum of compound **5** in  $\text{CDCl}_3$

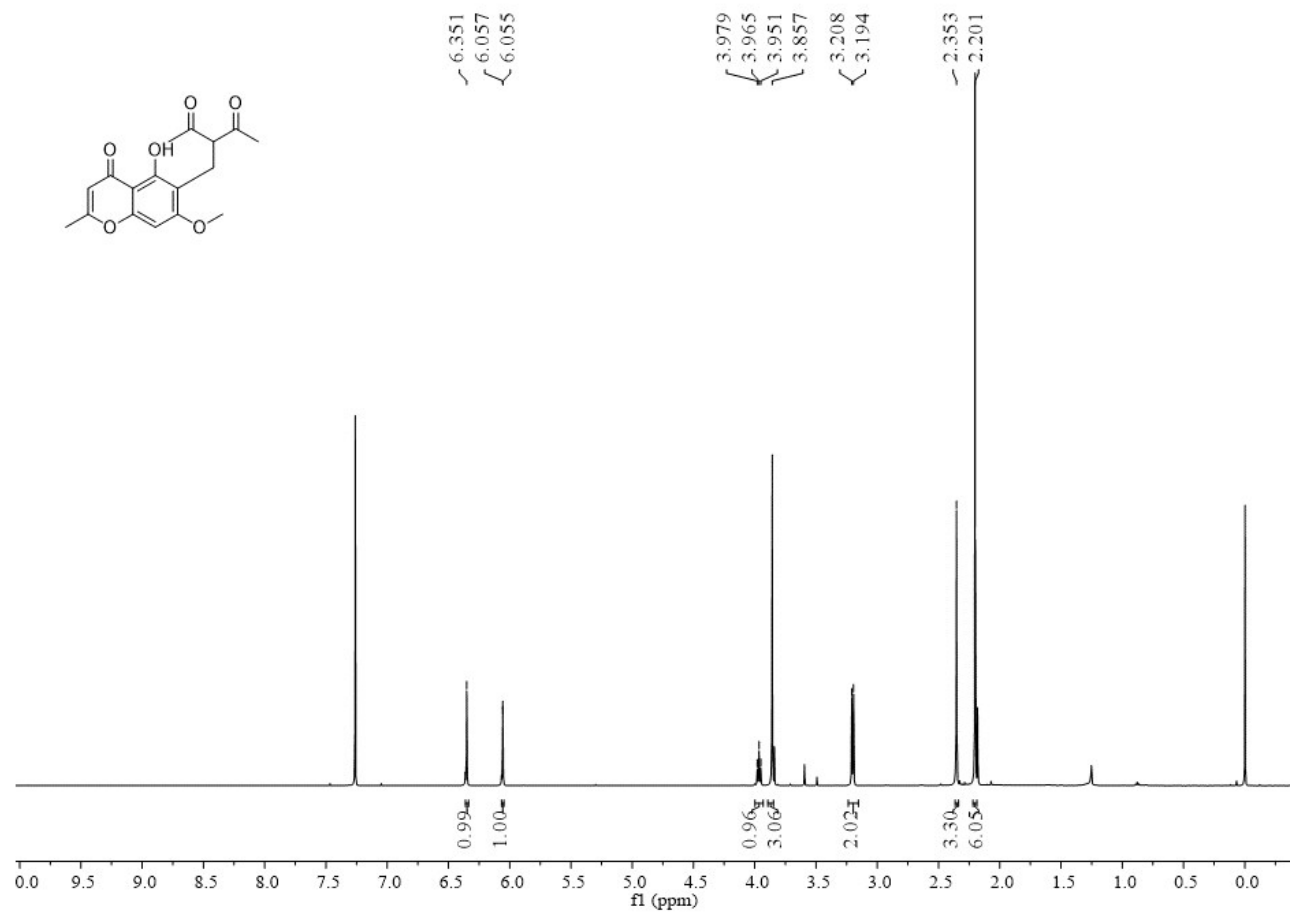

**Figure S27** <sup>1</sup>H NMR spectrum of compound **9** in CDCl<sub>3</sub> (500 MHz)

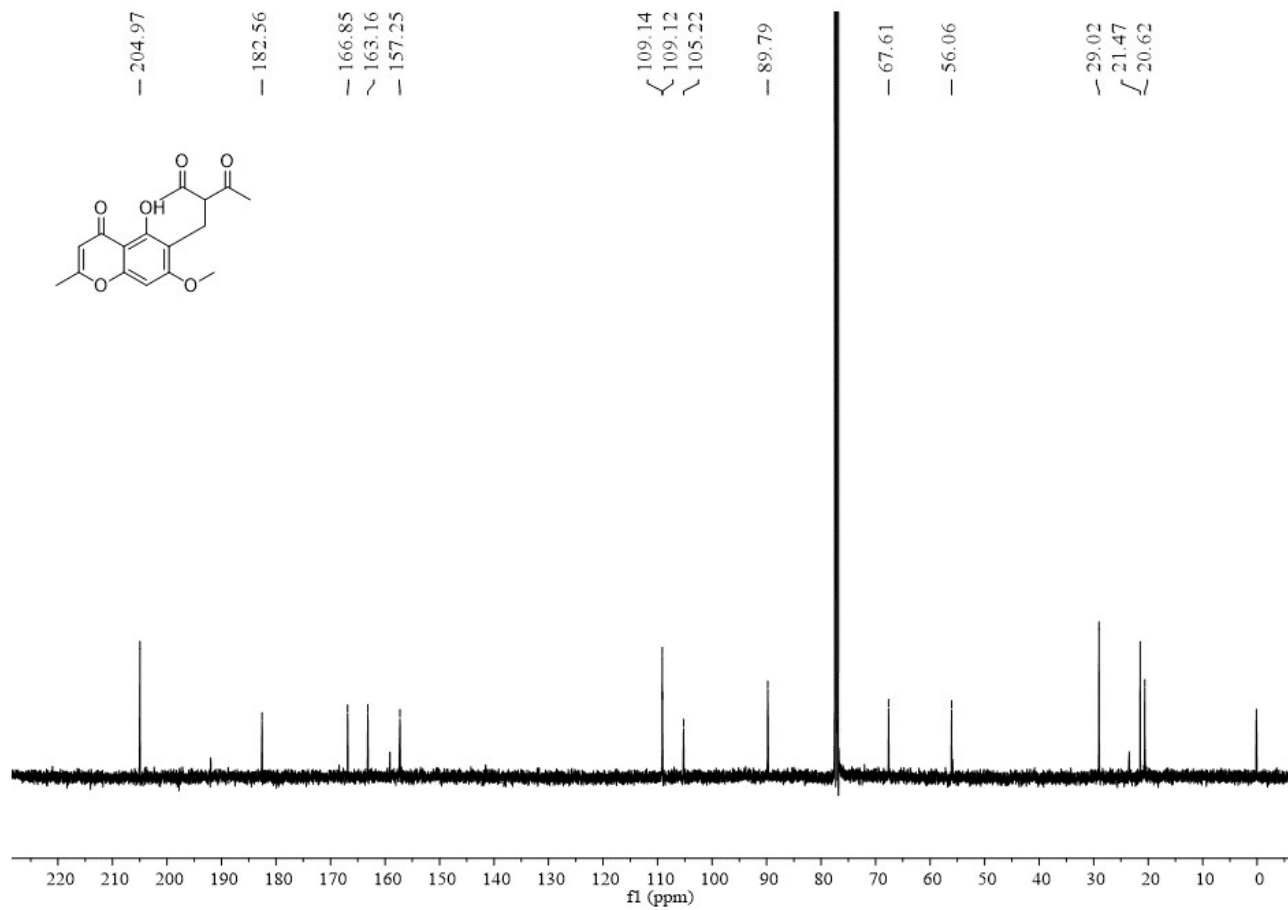

**Figure S28**  $^{13}\text{C}$  NMR spectrum of compound **9** in  $\text{CDCl}_3$  (125 MHz)

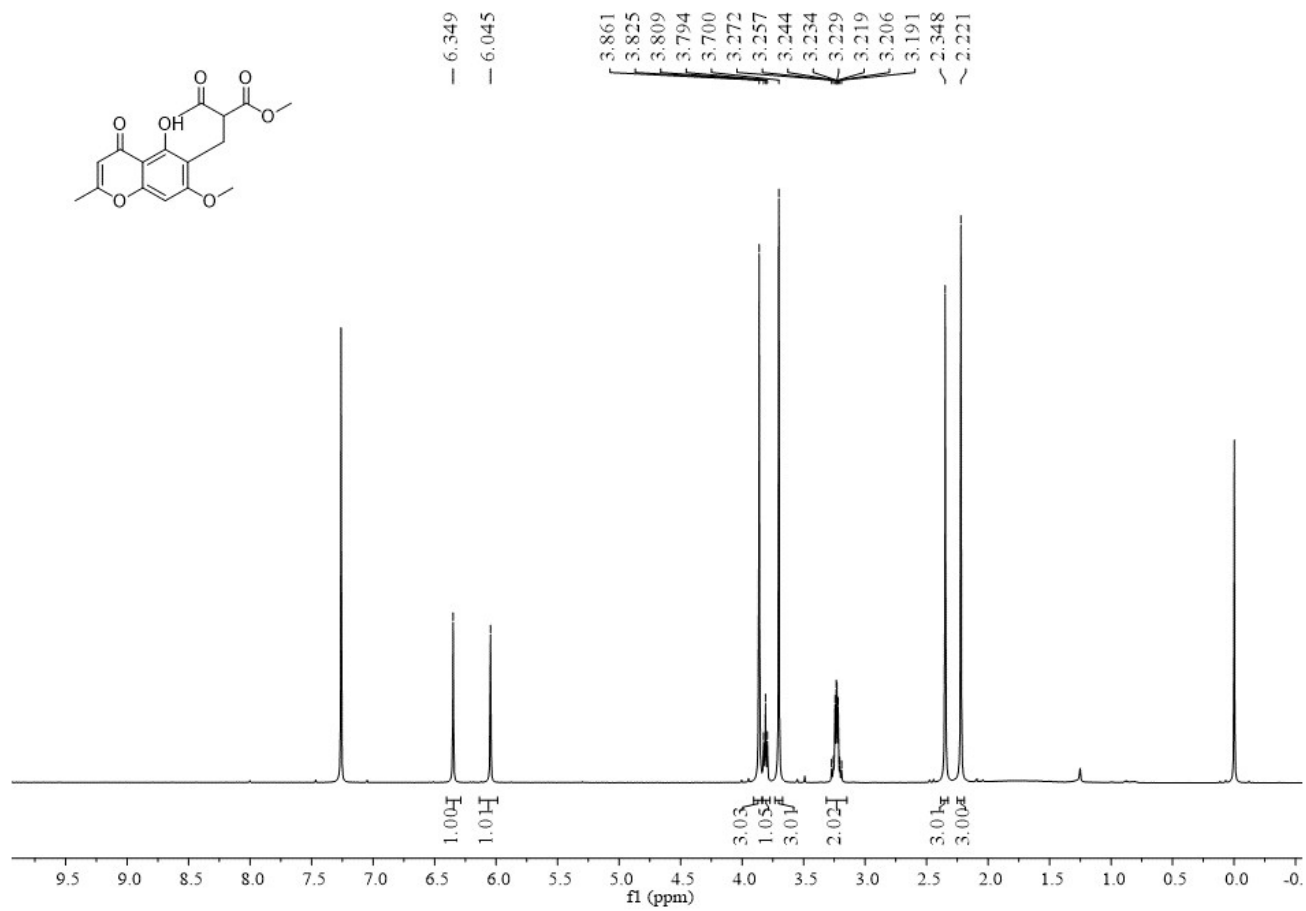

**Figure S29** <sup>1</sup>H NMR spectrum of compound **10** in CDCl<sub>3</sub> (500 MHz)



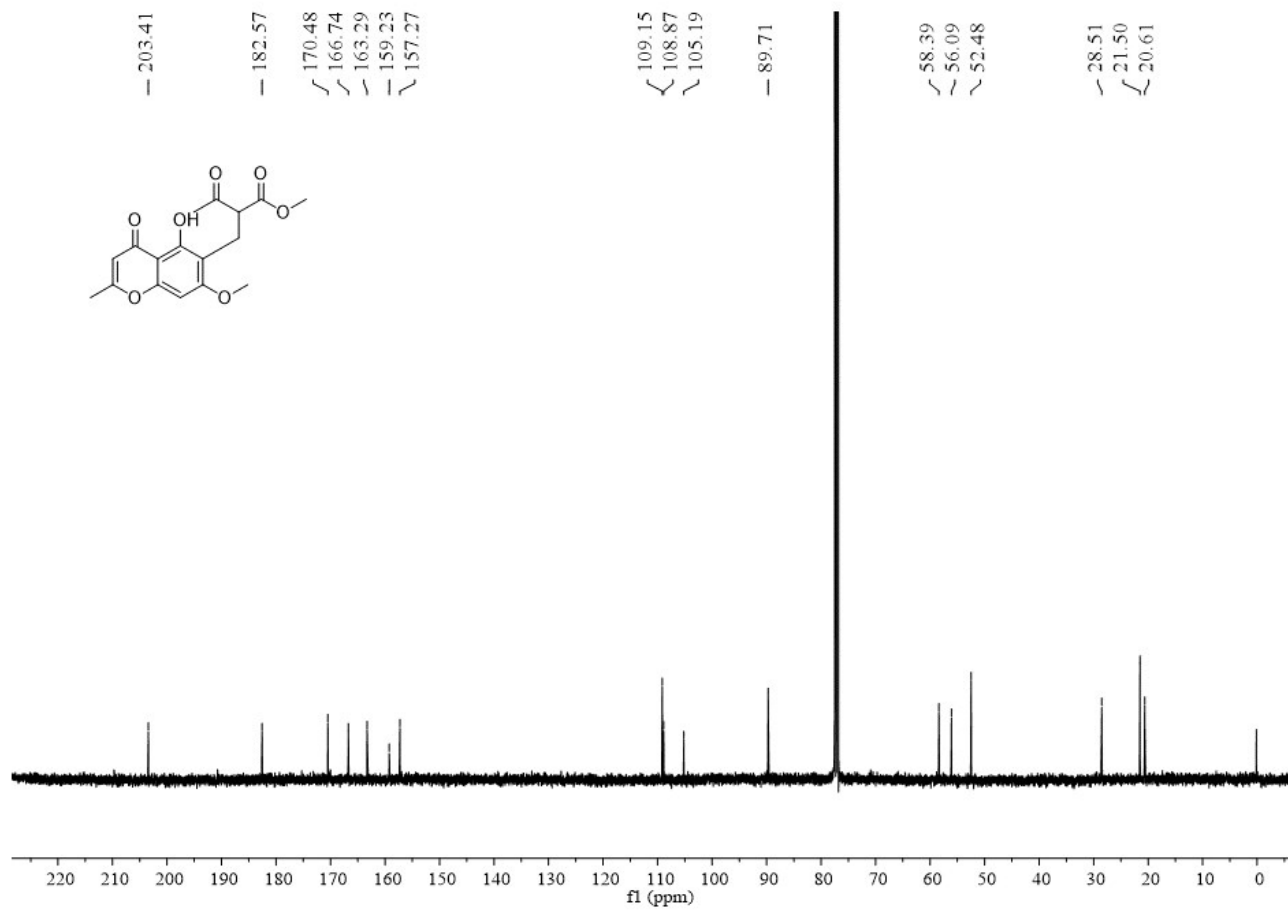

**Figure S30** <sup>13</sup>C NMR spectrum of compound **10** in CDCl<sub>3</sub> (125 MHz)

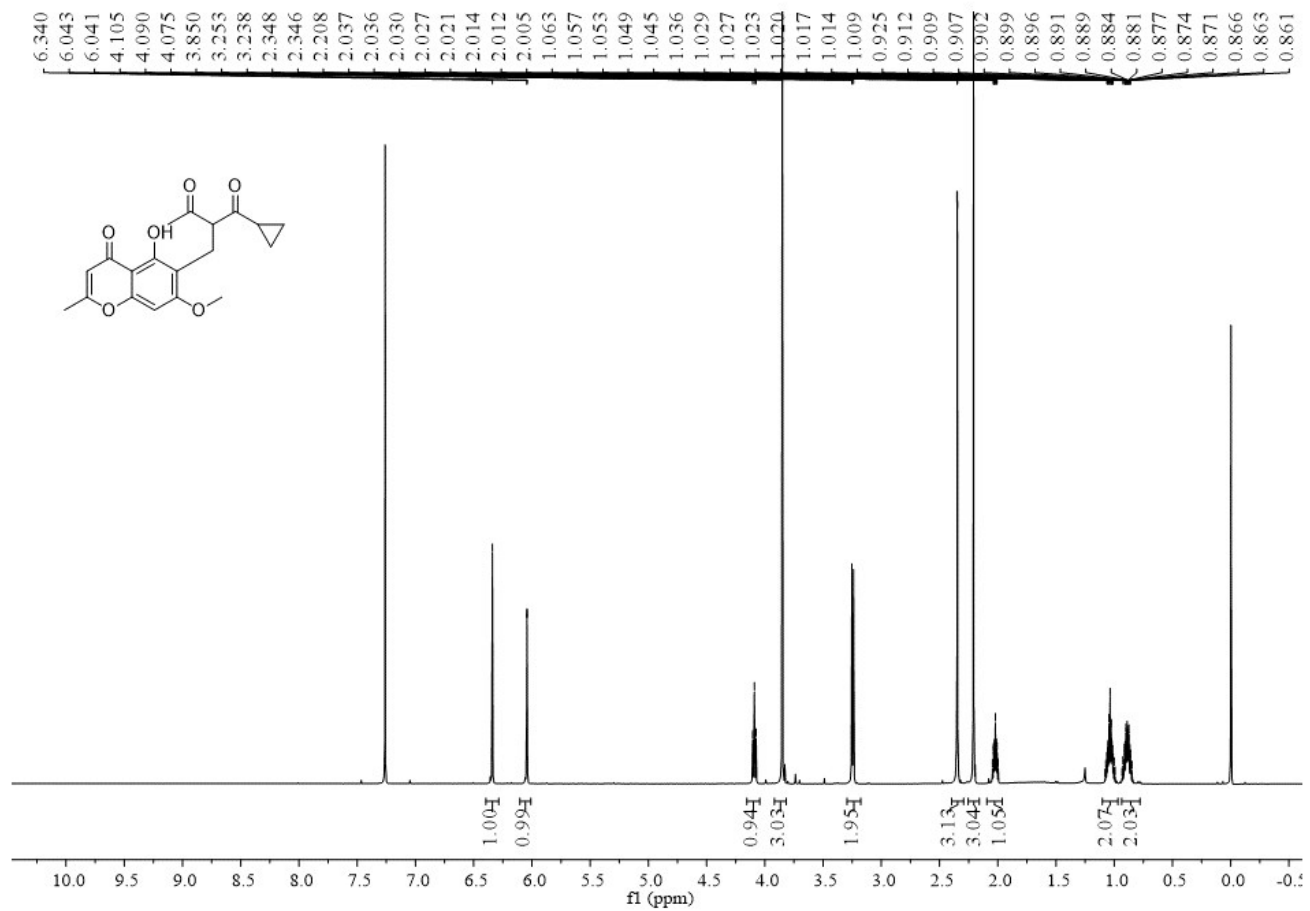

**Figure S31** <sup>1</sup>H NMR spectrum of compound **11** in CDCl<sub>3</sub> (500 MHz)

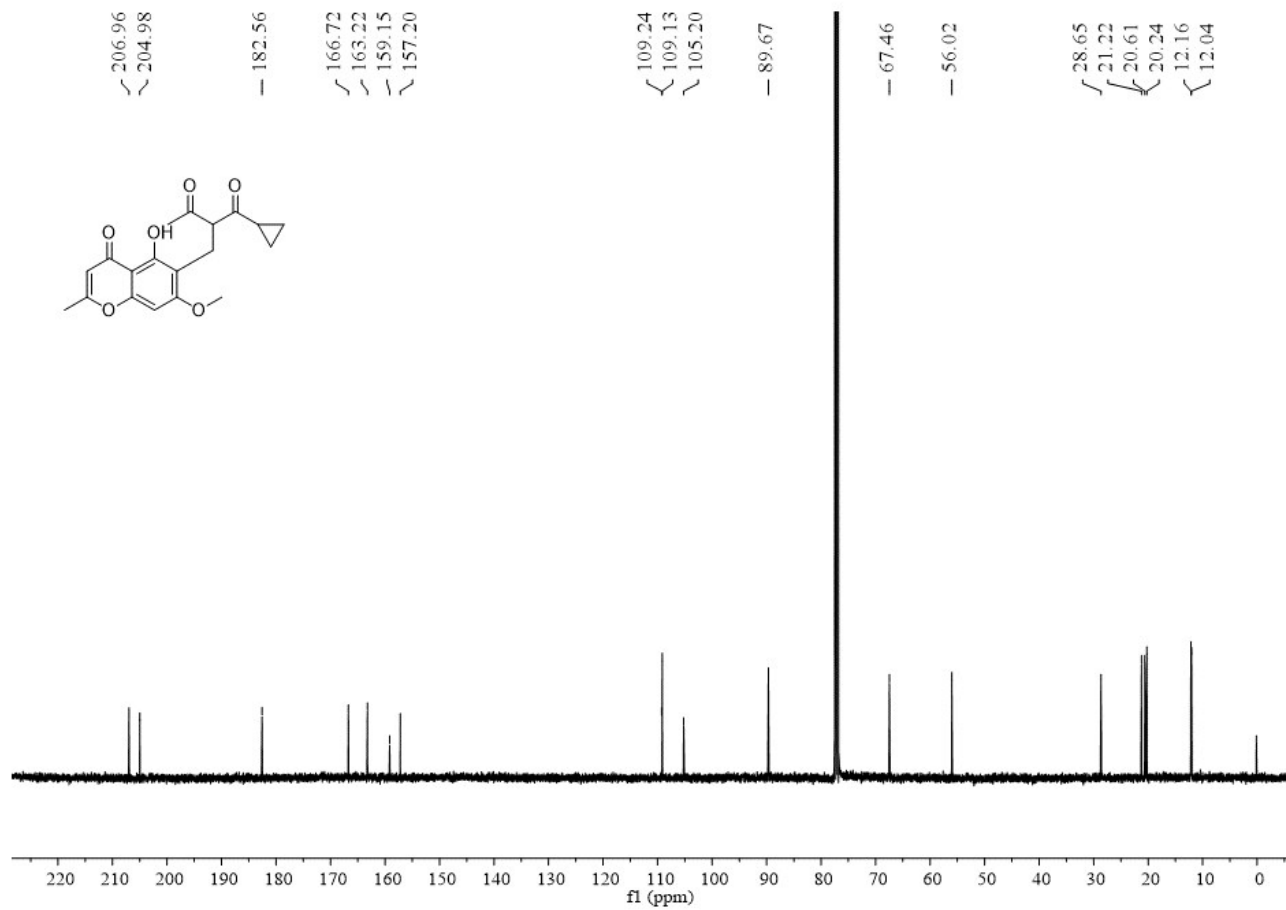

**Figure S32** <sup>13</sup>C NMR spectrum of compound **11** in CDCl<sub>3</sub> (125 MHz)
